# Supplementary material for: Highly Efficient Green and Red Narrowband Emissive Organic Light‐Emitting Diodes Employing Multi‐Resonant Thermally Activated Delayed Fluorescence Emitters
Source: PubMed Central journal article supplement (PMC10100094; doi:10.1002/anie.202213697), 2022-11-23

## checkCIF/PLATON report

Structure factors have been supplied for datablock(s) 3DPA-DiKTa, 3TPA-DiKTa

THIS REPORT IS FOR GUIDANCE ONLY. IF USED AS PART OF A REVIEW PROCEDURE FOR PUBLICATION, IT SHOULD NOT REPLACE THE EXPERTISE OF AN EXPERIENCED CRYSTALLOGRAPHIC REFEREE.

No syntax errors found.      CIF dictionary      Interpreting this report

### Datablock: 3TPA-DiKTa

---

Bond precision:      C-C = 0.0123 A      Wavelength=1.54184

Cell:                      a=10.9144 (11)                      b=17.2054 (11)                      c=17.3910 (12)  
                                    alpha=66.543 (6)                      beta=80.988 (7)                      gamma=76.734 (7)  
Temperature:              173 K

|                        | Calculated                | Reported      |
|------------------------|---------------------------|---------------|
| Volume                 | 2908.2 (4)                | 2908.2 (4)    |
| Space group            | P -1                      | P -1          |
| Hall group             | -P 1                      | -P 1          |
| Moiety formula         | C74 H50 N4 O2 [+ solvent] | C74 H50 N4 O2 |
| Sum formula            | C74 H50 N4 O2 [+ solvent] | C74 H50 N4 O2 |
| Mr                     | 1027.18                   | 1027.18       |
| Dx, g cm <sup>-3</sup> | 1.173                     | 1.173         |
| Z                      | 2                         | 2             |
| Mu (mm <sup>-1</sup> ) | 0.549                     | 0.549         |
| F000                   | 1076.0                    | 1076.0        |
| F000'                  | 1078.96                   |               |
| h, k, lmax             | 13, 20, 20                | 13, 20, 20    |
| Nref                   | 10634                     | 10312         |
| Tmin, Tmax             | 0.961, 0.978              | 0.353, 1.000  |
| Tmin'                  | 0.858                     |               |

Correction method= # Reported T Limits: Tmin=0.353 Tmax=1.000  
AbsCorr = MULTI-SCAN

Data completeness= 0.970                      Theta (max)= 68.240

R(reflections)= 0.1756 ( 4104)

wR2(reflections)=  
0.5199 ( 10312)

S = 1.504

Npar= 860

---

The following ALERTS were generated. Each ALERT has the format  
**test-name\_ALERT\_alert-type\_alert-level.**  
Click on the hyperlinks for more details of the test.

---

 **Alert level A**

PLAT084\_ALERT\_3\_A High wR2 Value (i.e. > 0.25) ..... 0.52 Report

**Author Response: Crystal diffracts weakly, no diffraction above 1.09 Å.**

PLAT410\_ALERT\_2\_A Short Intra H...H Contact H3 ..H19 . 1.62 Ång.  
x,y,z = 1\_555 Check

**Author Response: Unmodelled disorder in this part of the molecule. Attempts to extend disorder model unsuccessful.**

---

 **Alert level B**

PLAT082\_ALERT\_2\_B High R1 Value ..... 0.18 Report

**Author Response: Crystal diffracts weakly, no diffraction above 1.09 Å.**

PLAT097\_ALERT\_2\_B Large Reported Max. (Positive) Residual Density 1.05 eÅ<sup>-3</sup>

**Author Response: Probably part of diffuse solvent in pores, in too close proximity to minor component of a disordered ring to be removed during SQUEEZE.**

PLAT230\_ALERT\_2\_B Hirshfeld Test Diff for C13 --C14 . 7.7 s.u.

**Author Response: Unmodelled disorder in this part of the molecule. Attempts to extend disorder model unsuccessful.**

PLAT340\_ALERT\_3\_B Low Bond Precision on C-C Bonds ..... 0.01233 Ång.

**Author Response: Lower than ideal data quality arising from weak high angle diffraction and extent of disorder within the molecule.**

---

 **Alert level C**

DIFMX02\_ALERT\_1\_C The maximum difference density is > 0.1\*ZMAX\*0.75  
The relevant atom site should be identified.

|                   |                                                  |       |        |
|-------------------|--------------------------------------------------|-------|--------|
| PLAT026_ALERT_3_C | Ratio Observed / Unique Reflections (too) Low .. | 40%   | Check  |
| PLAT029_ALERT_3_C | _diffn_measured_fraction_theta_full value Low .  | 0.978 | Why?   |
| PLAT094_ALERT_2_C | Ratio of Maximum / Minimum Residual Density ...  | 2.92  | Report |
| PLAT230_ALERT_2_C | Hirshfeld Test Diff for 014 --C14 .              | 7.0   | s.u.   |

**Author Response: Unmodelled disorder in this part of the molecule. Attempts to extend disorder model unsuccessful.**

|                   |                                                  |        |        |
|-------------------|--------------------------------------------------|--------|--------|
| PLAT234_ALERT_4_C | Large Hirshfeld Difference N28 --C35A .          | 0.24   | Ang.   |
| PLAT234_ALERT_4_C | Large Hirshfeld Difference N47 --C48A .          | 0.18   | Ang.   |
| PLAT234_ALERT_4_C | Large Hirshfeld Difference N66 --C67 .           | 0.22   | Ang.   |
| PLAT234_ALERT_4_C | Large Hirshfeld Difference N66 --C73 .           | 0.24   | Ang.   |
| PLAT234_ALERT_4_C | Large Hirshfeld Difference C3 --C4 .             | 0.16   | Ang.   |
| PLAT234_ALERT_4_C | Large Hirshfeld Difference C18 --C19 .           | 0.17   | Ang.   |
| PLAT234_ALERT_4_C | Large Hirshfeld Difference C29 --C30 .           | 0.18   | Ang.   |
| PLAT234_ALERT_4_C | Large Hirshfeld Difference C29 --C34 .           | 0.19   | Ang.   |
| PLAT234_ALERT_4_C | Large Hirshfeld Difference C31 --C32 .           | 0.21   | Ang.   |
| PLAT234_ALERT_4_C | Large Hirshfeld Difference C39 --C40 .           | 0.16   | Ang.   |
| PLAT234_ALERT_4_C | Large Hirshfeld Difference C49 --C50 .           | 0.22   | Ang.   |
| PLAT234_ALERT_4_C | Large Hirshfeld Difference C67 --C72 .           | 0.23   | Ang.   |
| PLAT234_ALERT_4_C | Large Hirshfeld Difference C68 --C69 .           | 0.18   | Ang.   |
| PLAT234_ALERT_4_C | Large Hirshfeld Difference C71 --C72 .           | 0.23   | Ang.   |
| PLAT234_ALERT_4_C | Large Hirshfeld Difference C74 --C75 .           | 0.17   | Ang.   |
| PLAT241_ALERT_2_C | High 'MainMol' Ueq as Compared to Neighbors of   | C3     | Check  |
| PLAT241_ALERT_2_C | High 'MainMol' Ueq as Compared to Neighbors of   | C6     | Check  |
| PLAT241_ALERT_2_C | High 'MainMol' Ueq as Compared to Neighbors of   | C15    | Check  |
| PLAT241_ALERT_2_C | High 'MainMol' Ueq as Compared to Neighbors of   | C16    | Check  |
| PLAT241_ALERT_2_C | High 'MainMol' Ueq as Compared to Neighbors of   | C18    | Check  |
| PLAT241_ALERT_2_C | High 'MainMol' Ueq as Compared to Neighbors of   | C19    | Check  |
| PLAT241_ALERT_2_C | High 'MainMol' Ueq as Compared to Neighbors of   | C26    | Check  |
| PLAT241_ALERT_2_C | High 'MainMol' Ueq as Compared to Neighbors of   | C27    | Check  |
| PLAT242_ALERT_2_C | Low 'MainMol' Ueq as Compared to Neighbors of    | C2     | Check  |
| PLAT242_ALERT_2_C | Low 'MainMol' Ueq as Compared to Neighbors of    | C5     | Check  |
| PLAT242_ALERT_2_C | Low 'MainMol' Ueq as Compared to Neighbors of    | C20    | Check  |
| PLAT250_ALERT_2_C | Large U3/U1 Ratio for Average U(i,j) Tensor .... | 2.1    | Note   |
| PLAT260_ALERT_2_C | Large Average Ueq of Residue Including O8        | 0.133  | Check  |
| PLAT334_ALERT_2_C | Small <C-C> Benzene Dist. C15 -C20 .             | 1.37   | Ang.   |
| PLAT906_ALERT_3_C | Large K Value in the Analysis of Variance .....  | 24.414 | Check  |
| PLAT906_ALERT_3_C | Large K Value in the Analysis of Variance .....  | 4.678  | Check  |
| PLAT906_ALERT_3_C | Large K Value in the Analysis of Variance .....  | 2.573  | Check  |
| PLAT911_ALERT_3_C | Missing FCF Refl Between Thmin & STh/L= 0.600    | 235    | Report |

**Alert level G**

|                   |                                                  |       |        |
|-------------------|--------------------------------------------------|-------|--------|
| PLAT002_ALERT_2_G | Number of Distance or Angle Restraints on AtSite | 25    | Note   |
| PLAT003_ALERT_2_G | Number of Uiso or Uij Restrained non-H Atoms ... | 94    | Report |
| PLAT072_ALERT_2_G | SHELXL First Parameter in WGHT Unusually Large   | 0.20  | Report |
| PLAT172_ALERT_4_G | The CIF-Embedded .res File Contains DFIX Records | 4     | Report |
| PLAT178_ALERT_4_G | The CIF-Embedded .res File Contains SIMU Records | 5     | Report |
| PLAT187_ALERT_4_G | The CIF-Embedded .res File Contains RIGU Records | 3     | Report |
| PLAT301_ALERT_3_G | Main Residue Disorder .....(Resd 1 )             | 54%   | Note   |
| PLAT410_ALERT_2_G | Short Intra H...H Contact H16 ..H61 .            | 2.04  | Ang.   |
|                   | x, y, z =                                        | 1_555 | Check  |

**Author Response: Unmodelled disorder in this part of the molecule. Attempts to extend disorder model unsuccessful.**

PLAT410\_ALERT\_2\_G Short Intra H...H Contact H18 ..H65 . 2.00 Ang.  
x,y,z = 1\_555 Check

**Author Response: Unmodelled disorder in this part of the molecule. Attempts to extend disorder model unsuccessful.**

|                                                                    |      |         |
|--------------------------------------------------------------------|------|---------|
| PLAT605_ALERT_4_G Largest Solvent Accessible VOID in the Structure | 115  | A**3    |
| PLAT811_ALERT_5_G No ADDSYM Analysis: Too Many Excluded Atoms .... |      | ! Info  |
| PLAT860_ALERT_3_G Number of Least-Squares Restraints .....         | 1360 | Note    |
| PLAT869_ALERT_4_G ALERTS Related to the Use of SQUEEZE Suppressed  |      | ! Info  |
| PLAT912_ALERT_4_G Missing # of FCF Reflections Above STh/L= 0.600  | 86   | Note    |
| PLAT933_ALERT_2_G Number of HKL-OMIT Records in Embedded .res File |      | 3 Note  |
| PLAT941_ALERT_3_G Average HKL Measurement Multiplicity .....       | 2.9  | Low     |
| PLAT978_ALERT_2_G Number C-C Bonds with Positive Residual Density. |      | 3 Info  |
| PLAT992_ALERT_5_G Repd & Actual _reflns_number_gt Values Differ by |      | 3 Check |

---

2 **ALERT level A** = Most likely a serious problem - resolve or explain  
4 **ALERT level B** = A potentially serious problem, consider carefully  
38 **ALERT level C** = Check. Ensure it is not caused by an omission or oversight  
18 **ALERT level G** = General information/check it is not something unexpected

1 ALERT type 1 CIF construction/syntax error, inconsistent or missing data  
27 ALERT type 2 Indicator that the structure model may be wrong or deficient  
11 ALERT type 3 Indicator that the structure quality may be low  
21 ALERT type 4 Improvement, methodology, query or suggestion  
2 ALERT type 5 Informative message, check

---

## Datablock: 3DPA-DiKTa

---

Bond precision: C-C = 0.0023 A

Wavelength=1.54184

Cell: a=11.0801(2) b=12.5559(2) c=17.2089(3)  
alpha=88.893(1) beta=89.488(1) gamma=83.638(1)  
Temperature: 173 K

|                        | Calculated                             | Reported                |
|------------------------|----------------------------------------|-------------------------|
| Volume                 | 2378.87(7)                             | 2378.87(7)              |
| Space group            | P -1                                   | P -1                    |
| Hall group             | -P 1                                   | -P 1                    |
| Moiety formula         | C56 H38 N4 O2, C H2 Cl2 [+<br>solvent] | C56 H38 N4 O2, C H2 Cl2 |
| Sum formula            | C57 H40 Cl2 N4 O2 [+<br>solvent]       | C57 H40 Cl2 N4 O2       |
| Mr                     | 883.83                                 | 883.83                  |
| Dx, g cm <sup>-3</sup> | 1.234                                  | 1.234                   |
| Z                      | 2                                      | 2                       |
| Mu (mm <sup>-1</sup> ) | 1.592                                  | 1.592                   |
| F000                   | 920.0                                  | 920.0                   |
| F000'                  | 923.84                                 |                         |
| h, k, lmax             | 13, 15, 21                             | 13, 15, 21              |
| Nref                   | 9863                                   | 9419                    |
| Tmin, Tmax             | 0.926, 0.984                           | 0.861, 1.000            |
| Tmin'                  | 0.788                                  |                         |

Correction method= # Reported T Limits: Tmin=0.861 Tmax=1.000  
AbsCorr = MULTI-SCAN

Data completeness= 0.955                      Theta(max)= 75.485

R(reflections)= 0.0462( 8043)                      wR2(reflections)=  
0.1384( 9419)  
S = 1.058                      Npar= 641

The following ALERTS were generated. Each ALERT has the format  
**test-name\_ALERT\_alert-type\_alert-level.**  
Click on the hyperlinks for more details of the test.

#### Alert level C

|                   |                                                  |            |
|-------------------|--------------------------------------------------|------------|
| PLAT911_ALERT_3_C | Missing FCF Refl Between Thmin & STh/L= 0.600    | 154 Report |
| PLAT918_ALERT_3_C | Reflection(s) with I(obs) much Smaller I(calc) . | 1 Check    |
| PLAT934_ALERT_3_C | Number of (Iobs-Icalc)/Sigma(W) > 10 Outliers .. | 1 Check    |

#### Alert level G

|                   |                                                  |              |
|-------------------|--------------------------------------------------|--------------|
| PLAT003_ALERT_2_G | Number of Uiso or Uij Restrained non-H Atoms ... | 12 Report    |
| PLAT154_ALERT_1_G | The s.u.'s on the Cell Angles are Equal ..(Note) | 0.001 Degree |
| PLAT178_ALERT_4_G | The CIF-Embedded .res File Contains SIMU Records | 1 Report     |
| PLAT187_ALERT_4_G | The CIF-Embedded .res File Contains RIGU Records | 1 Report     |
| PLAT301_ALERT_3_G | Main Residue Disorder .....(Resd 1 )             | 10% Note     |
| PLAT605_ALERT_4_G | Largest Solvent Accessible VOID in the Structure | 266 A**3     |
| PLAT720_ALERT_4_G | Number of Unusual/Non-Standard Labels .....      | 3 Note       |
| PLAT860_ALERT_3_G | Number of Least-Squares Restraints .....         | 225 Note     |

|                   |                                                  |     |       |
|-------------------|--------------------------------------------------|-----|-------|
| PLAT869_ALERT_4_G | ALERTS Related to the Use of SQUEEZE Suppressed  | !   | Info  |
| PLAT912_ALERT_4_G | Missing # of FCF Reflections Above STh/L= 0.600  | 291 | Note  |
| PLAT913_ALERT_3_G | Missing # of Very Strong Reflections in FCF .... | 1   | Note  |
| PLAT941_ALERT_3_G | Average HKL Measurement Multiplicity .....       | 3.0 | Low   |
| PLAT978_ALERT_2_G | Number C-C Bonds with Positive Residual Density. | 8   | Info  |
| PLAT992_ALERT_5_G | Repd & Actual _reflns_number_gt Values Differ by | 3   | Check |

---

0 **ALERT level A** = Most likely a serious problem - resolve or explain  
0 **ALERT level B** = A potentially serious problem, consider carefully  
3 **ALERT level C** = Check. Ensure it is not caused by an omission or oversight  
14 **ALERT level G** = General information/check it is not something unexpected

1 ALERT type 1 CIF construction/syntax error, inconsistent or missing data  
2 ALERT type 2 Indicator that the structure model may be wrong or deficient  
7 ALERT type 3 Indicator that the structure quality may be low  
6 ALERT type 4 Improvement, methodology, query or suggestion  
1 ALERT type 5 Informative message, check

---

It is advisable to attempt to resolve as many as possible of the alerts in all categories. Often the minor alerts point to easily fixed oversights, errors and omissions in your CIF or refinement strategy, so attention to these fine details can be worthwhile. In order to resolve some of the more serious problems it may be necessary to carry out additional measurements or structure refinements. However, the purpose of your study may justify the reported deviations and the more serious of these should normally be commented upon in the discussion or experimental section of a paper or in the "special\_details" fields of the CIF. checkCIF was carefully designed to identify outliers and unusual parameters, but every test has its limitations and alerts that are not important in a particular case may appear. Conversely, the absence of alerts does not guarantee there are no aspects of the results needing attention. It is up to the individual to critically assess their own results and, if necessary, seek expert advice.

### **Publication of your CIF in IUCr journals**

A basic structural check has been run on your CIF. These basic checks will be run on all CIFs submitted for publication in IUCr journals (*Acta Crystallographica*, *Journal of Applied Crystallography*, *Journal of Synchrotron Radiation*); however, if you intend to submit to *Acta Crystallographica Section C* or *E* or *IUCrData*, you should make sure that full publication checks are run on the final version of your CIF prior to submission.

### **Publication of your CIF in other journals**

Please refer to the *Notes for Authors* of the relevant journal for any special instructions relating to CIF submission.

---

**PLATON version of 18/05/2022; check.def file version of 17/05/2022**

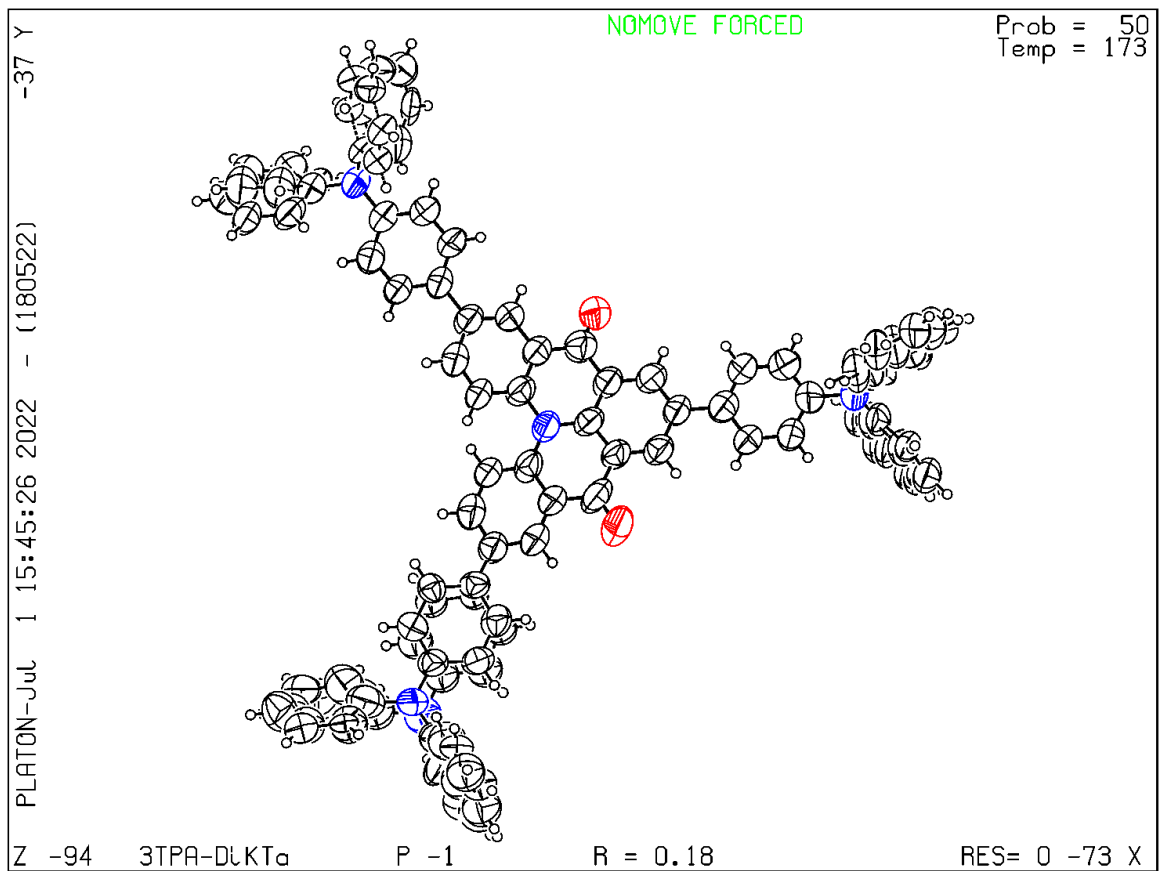

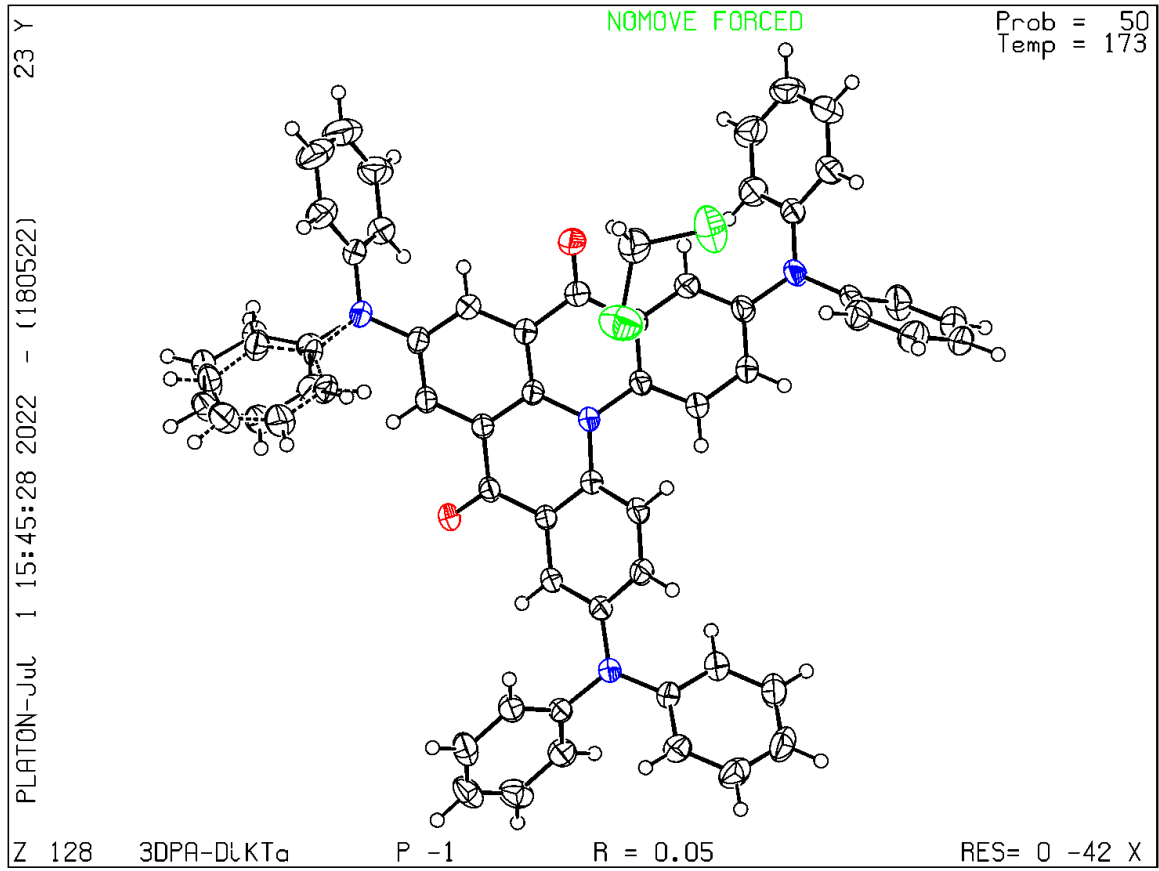

Supplement: ANIE-61-0-s001.pdf [file ANIE-61-0-s001.pdf]
