# Supplementary material for: Highly Efficient Green and Red Narrowband Emissive Organic Light‐Emitting Diodes Employing Multi‐Resonant Thermally Activated Delayed Fluorescence Emitters
Source: PubMed Central journal article supplement (PMC10100094; doi:10.1002/anie.202213697), 2022-11-23
Supplement: ANIE-61-0-s002.pdf [file ANIE-61-0-s002.pdf]

## Supporting Information

### **Highly Efficient Green and Red Narrowband Emissive Organic Light-Emitting Diodes Employing Multi-Resonant Thermally Activated Delayed Fluorescence Emitters**

*S. Wu, A. Kumar Gupta, K. Yoshida, J. Gong, D. Hall, D. B. Cordes, A. M. Z. Slawin, I. D. W. Samuel\*, E. Zysman-Colman\**

## **Supporting Information**

### **Highly Efficient Green & Red Narrowband Emissive Organic Light-Emitting Diodes Employing Multi-Resonant Thermally Activated Delayed Fluorescence Emitters**

*Sen Wu,<sup>a†</sup> Abhishek Kumar Gupta,<sup>a,b†</sup> Kou Yoshida,<sup>b</sup> Junyi Gong,<sup>b</sup> David Hall,<sup>a</sup> David B. Cordes,<sup>a</sup> Alexandra M. Z. Slawin,<sup>a</sup> Ifor D. W. Samuel<sup>b\*</sup> and Eli Zysman-Colman<sup>a\*</sup>*

<sup>a</sup>Organic Semiconductor Centre, EaStCHEM School of Chemistry, University of St Andrews, St Andrews, Fife, UK, KY16 9ST, Fax: +44-1334 463808; Tel: +44-1334 463826; E-mail: eli.zysman-colman@st-andrews.ac.uk.

<sup>b</sup>Organic Semiconductor Centre, SUPA School of Physics and Astronomy, University of St Andrews, St Andrews, UK, KY16 9SS; E-mail: idws@st-andrews.ac.uk

# Table of Contents

|                                             |     |
|---------------------------------------------|-----|
| General methods .....                       | S3  |
| Literature Study .....                      | S11 |
| X-Ray structural analysis .....             | S12 |
| Calculation .....                           | S14 |
| Synthesis .....                             | S19 |
| Optoelectronic characterization .....       | S27 |
| OLEDs fabrication and characterization..... | S31 |
| Reference .....                             | S36 |

## General methods

**General Synthetic Procedures.** All reagents and solvents were obtained from commercial sources and used as received unless otherwise stated. Air-sensitive reactions were done under a nitrogen atmosphere using Schlenk techniques. Dry solvents used in the reaction were obtained from a MBRAUN SPS5 solvent purification system. Flash column chromatography was carried out using silica gel (Silica-P from Silicycle, 60 Å, 40-63 µm). Analytical thin-layer-chromatography (TLC) was performed with silica plates with aluminium backings (250 µm with F-254 indicator). TLC visualization was accomplished by 254/365 nm UV lamp. HPLC analysis was conducted on a Shimadzu LC-40 HPLC system. HPLC traces were performed using a Shim-pack GIST 3µm C18 reverse phase analytical column. <sup>1</sup>H and <sup>13</sup>C and NMR spectra were recorded on a Bruker Advance spectrometer (500 MHz for <sup>1</sup>H and 126 MHz for <sup>13</sup>C). The following abbreviations have been used for multiplicity assignments: “s” for singlet, “d” for doublet, “t” for triplet, “m” for multiplet, “dd” for doublet of doublets, “dt” for doublet of triplets. <sup>1</sup>H and <sup>13</sup>C NMR spectra were referenced to the solvent peaks). Melting points were measured using open-ended capillaries on an Electrothermal 1101D Mel-Temp apparatus and are uncorrected. High-resolution mass spectrometry (HRMS) was performed at University of Edinburgh Mass Spectrometry Facility. Elemental analyses were performed by Dr. Joe Casillo at the University of Edinburgh.

**Electrochemistry measurements.** Cyclic Voltammetry (CV) analysis was performed on an Electrochemical Analyzer potentiostat model 620E from CH Instruments at a sweep rate of 100 mV/s. Differential pulse voltammetry (DPV) was conducted with an increment potential of 0.004 V and a pulse amplitude, width, and period of 50 mV, 0.05, and 0.5 s, respectively. Samples were prepared in DCM solutions, which were degassed

by sparging with DCM-saturated nitrogen gas for 5 minutes prior to measurements. All measurements were performed using 0.1 M DCM solution of tetra-*n*-butylammonium hexafluorophosphate, [*n*Bu<sub>4</sub>N]PF<sub>6</sub>. An Ag/Ag<sup>+</sup> electrode was used as the reference electrode while a platinum electrode and a platinum wire were used as the working electrode and counter electrode, respectively. The redox potentials are reported relative to a saturated calomel electrode (SCE) with a ferrocenium/ferrocene (Fc/Fc<sup>+</sup>) redox couple as the internal standard (0.46V vs SCE).<sup>[1]</sup>

**Photophysical measurements.** Optically dilute solutions of concentrations on the order of 10<sup>-5</sup> or 10<sup>-6</sup> M were prepared in spectroscopic or HPLC grade solvents for absorption and emission analysis. Absorption spectra were recorded at room temperature on a Shimadzu UV-2600 double beam spectrophotometer with a 1 cm quartz cuvette. Molar absorptivity determination was verified by linear regression analysis of values obtained from at least four independent solutions at varying concentrations with absorbance ranging from 0.025 to 0.100.

For emission studies, steady-state emission, excitation spectra and time-resolved emission spectra were recorded at room temperature using an Edinburgh Instruments FLS980 fluorimeter. Samples were excited at 340 nm for steady-state measurements. Photoluminescence quantum yields for solutions were determined using the optically dilute method,<sup>[2]</sup> in which four sample solutions with absorbances of ca. 0.10, 0.075, 0.050 and 0.025 at 342 nm were used. The Beer-Lambert law was found to remain linear at the concentrations of the solutions. For each sample, linearity between absorption and emission intensity was verified through linear regression analysis with the Pearson regression factor ( $R^2$ ) for the linear fit of the data set surpassing 0.9. Individual relative quantum yield values were calculated for each solution and the values reported represent the slope obtained from the linear fit of these results. The

quantum yield of the sample,  $\Phi_{PL}$ , can be determined by the equation  $\Phi_{PL} = (\Phi_r * \frac{A_r}{A_s} * \frac{I_s}{I_r} * \frac{n_s^2}{n_r^2})$ ,<sup>[2]</sup> where A stands for the absorbance at the excitation wavelength ( $\lambda_{exc} = 342$  nm), I is the integrated area under the corrected emission curve and n is the refractive index of the solvent with the subscripts “s” representing sample and “r” representing reference.  $\Phi_r$  is the absolute quantum yield of the external reference Rhodamine 6G ( $\Phi_r = 95\%$  in ethanol).<sup>[3]</sup>

An integrating sphere (Hamamatsu, C9920-02) was employed for the photoluminescence quantum yield measurements of thin film samples.<sup>[4]</sup> The  $\Phi_{PL}$  of the films were then measured in air and N<sub>2</sub> environment by purging the integrating sphere with N<sub>2</sub> gas flow. The photophysical properties of the film samples were measured using an Edinburgh Instruments FS980 fluorimeter. Time-resolved PL measurements of the thin films were carried out using the multi-channel scaling (MCS) technique. The samples were excited at 379 nm by a pulsed laser diode (PicoQuant, LDH-D-C-375, FWHM < 40 ps, pulse energy =  $58.5 \pm 1.2$  pJ, peak power =  $1.5 \pm 0.3$  W, laser spot diameter =  $0.4 \pm 0.1$  mm, power density =  $11.6 \pm 3.7$  mW/cm<sup>2</sup>) and were kept in a vacuum of  $< 8 \times 10^{-4}$  mbar. The singlet and triplet state energies were determined from the onset values of the prompt fluorescence and phosphorescence spectra at 77 K. The singlet-triplet energy gap ( $\Delta E_{ST}$ ) was estimated from the difference in energy of the prompt fluorescence and phosphorescence spectra. Phosphorescence spectra were measured from 1 ms after photoexcitation with an iCCD exposure time of 8.5 ms. Prompt fluorescence spectra were measured from 1 ns after photoexcitation with an iCCD exposure time of 100 ns. The films were excited by a femtosecond laser emitting at 343 nm (Orpheus-N, model: SP-06-200-PP). Emission from the samples was focused onto a spectrograph (Chromex imaging, 250is spectrograph) and detected on a sensitive

gated iCCD camera (Stanford Computer Optics, 4Picos) having sub-nanosecond resolution.

***Fitting of time-resolved luminescence measurements:*** Time-resolved PL measurements were fitted to a sum of exponentials decay model, with chi-squared ( $\chi^2$ ) values between 1 and 2, using the EI FLS980. Each component of the decay is assigned with a weight, ( $w_i$ ), which is the contribution of the emission from each component to the total emission.

The average lifetime was then calculated using the following expressions:<sup>[5]</sup>

1. Two exponential decay model:

$$\tau_{AVG} = \tau_1 w_1 + \tau_2 w_2 \quad (S1)$$

with weights defined as  $w_1 = \frac{A_1 \tau_1}{A_1 \tau_1 + A_2 \tau_2}$  and  $w_2 = \frac{A_2 \tau_2}{A_1 \tau_1 + A_2 \tau_2}$  where  $A_1$  and  $A_2$  are the preexponential-factors of each component.

2. Three exponential decay model:

$$\tau_{AVG} = \tau_1 w_1 + \tau_2 w_2 + \tau_3 w_3 \quad (S2)$$

with weights defined as  $w_1 = \frac{A_1 \tau_1}{A_1 \tau_1 + A_2 \tau_2 + A_3 \tau_3}$ ,  $w_2 = \frac{A_2 \tau_2}{A_1 \tau_1 + A_2 \tau_2 + A_3 \tau_3}$  and  $w_3 = \frac{A_3 \tau_3}{A_1 \tau_1 + A_2 \tau_2 + A_3 \tau_3}$  where  $A_1$ ,  $A_2$  and  $A_3$  are the preexponential-factors of each component.

***OLED Fabrication and Characterization:*** The OLED devices were fabricated in a bottom-emitting structure via thermal evaporation in a high vacuum at a base pressure of  $<5 \times 10^{-7}$  mbar. A pre-patterned glass substrate coated with indium doped tin oxide (ITO) was cleaned sequentially by ultrasonication in acetone, and isopropanol for 15

minutes. The temperature of ultrasonication bath was set at 60-70 °C. The cleaned substrate was exposed to oxygen plasma for 3 min to remove all dust and organics on the ITO surface and to increase the work function of ITO anode for better hole injection from the anode to organic layer. The substrate was loaded in the thermal evaporator. Organic layers were deposited at a rate of 0.3-1.0 Å/s, monitored using a quartz crystal. The electron injection layer, LiF, was deposited at a rate of 0.05 Å/s, while the Al cathode was deposited initially with a rate of 0.5 Å/s to obtain 10 nm thickness and after that the rate of Al cathode was increased to 3 Å/s. Two custom-made shadow masks were used to define the area of the evaporations. The organic layers and LiF were evaporated with a same shadow mask but Al was evaporated with the other mask. The active area of the OLED was 2 mm<sup>2</sup>, determined by the spatial overlap of the anode and cathode electrodes. All the devices were encapsulated with glass lids and UV epoxy resin inside a N<sub>2</sub> filled globe box. The luminance-current-voltage characteristics were measured in an ambient environment using a Keithley 2400 source meter and a homemade photodiode circuit connected to a Keithley 2000 multimeter for the voltage reading. The external quantum efficiency was calculated assuming Lambertian emission pattern for the OLEDs. The electroluminescence spectra were recorded by an Andor DV420-BV CCD spectrometer.

***Determination of emitter dipole orientation by angle-resolved PL measurement:***

Dipole orientation of emitter molecules was determined by angle-resolved PL measurements of thin films doped with each emitter.<sup>[6]</sup> The doping concentration of the films are same as the ones used for the OLEDs, i.e., 2 wt%, while the thicknesses of these films are around 50 nm. To quantify this, an anisotropy factor ( $a$ ) was used, which is defined by the ratio of emitted power by vertical dipoles to total emitted power by all dipoles.<sup>[7]</sup> We note that for perfectly horizontal dipole orientation (i.e. parallel to the



substrate surface),  $a = 0$ , for isotropic orientation,  $a = 1/3$ , and for perfectly vertical orientation,  $a = 1$ . The details of our set-up and calculation can be found in reference.<sup>[8]</sup> We obtained the optical constants and thickness of each organic layer using a variable angle spectroscopic ellipsometer (J. A. Woollam, M-2000 Ellipsometer) to measure films deposited on glass substrates. The fitting process to obtain optical constants is that starting with the Cauchy model for non-absorbing region, where no absorption of dopants is found, we fitted absorbing region with b-spline model. The fitting to the non-absorbing region of **3TPA-DiKTa** film is from 570 nm and the one of **3DPA-DiKTa** film is from 650 nm. Figure S1 shows the refractive index spectra of each the organic film. The observed refractive index spectra of mCP neat film and doped film of both molecules in mCP are quite similar. The small shoulders at 380 nm of the spectrum of the **3TPA-DiKTa** film originates from the absorption by **3TPA-DiKTa**, which was confirmed by comparison with the absorption spectrum of the dopant in toluene solution.

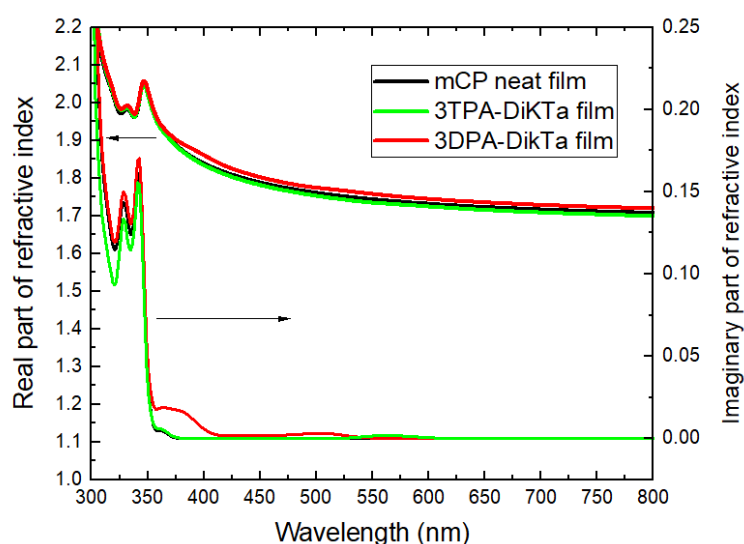

Figure S1. Refractive index spectra of each organic layer fabricated on glass substrate.

**Calculation of out-coupling efficiency of OLEDs:** The out-coupling simulation of the OLEDs is based on emission dipole as forced damped harmonic oscillator and

embedded in thin film stacks.<sup>[9]</sup> The details of the calculation can be found in reference.<sup>[8]</sup>

In the optical calculation, it was assumed that emitter dipole is localized at the mCP and TmPyPB interface. This is reasonable because the hole conduction is dominant in the host, mCP. The actual dipole position within the emission layer was not determined. Errors of 10% in maximum for the **3TPA-DiKTa** and around 30% for **3DPA-DiKTa** were estimated (See Figure S2).

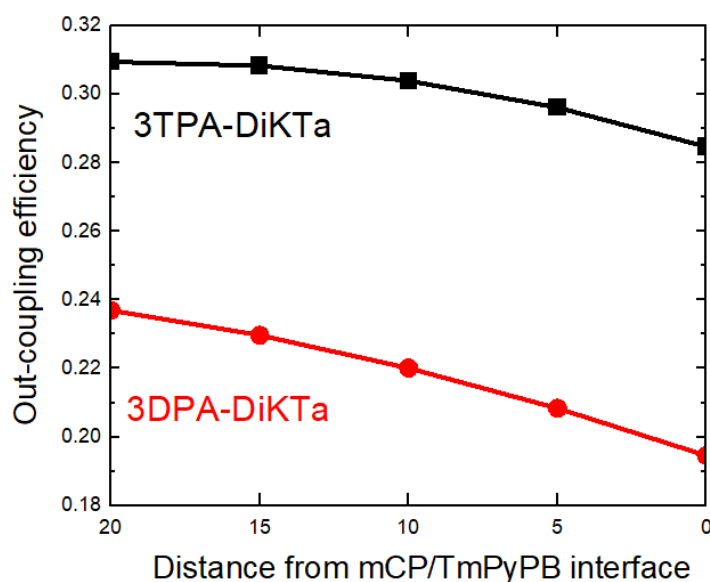

Figure S2. Effect of dipole position on the out-coupling efficiency of the OLEDs with different **3TPA-DiKTa** and **3DPA-DiKTa**. Dipole position was changed within the emission layer and plotted as a function of distance from mCP/TmPyPB interface.

**Quantum chemical calculations.** The calculations were performed using Density Functional Theory (DFT) within Gaussian 16<sup>[10]</sup> as well as the second order algebraic diagrammatic construction Spin-Component Scaling (ADC (2)-SCS) method using the Turbomole/7.5 package. For the DFT calculation, the ground state was optimized with PBE0<sup>[11]</sup> functional and the 6-31G(d,p) basis set,<sup>[12]</sup> and excited state calculations have been performed using Time-Dependent DFT within the Tamm-Dancoff approximation

(TDA-DFT)<sup>[13]</sup> with the same functional and basis set as for the ground state geometry optimization in gas phase. The molecular orbitals were visualized with Gaussview 5.0 software. For the ADC(2) calculation, the ground states was optimized with ADC (2)-SCS method and cc-pVDZ basis set in gas phase based on the geometry calculated by DFT.<sup>[14]</sup> Vertical excited states were performed on the ground state optimized structure using ADC(2)-SCS method. Different density plots were used to visualize change in electronic density between the ground and excited state and were visualized using the VESTA package.<sup>[15]</sup>

## Literature Study

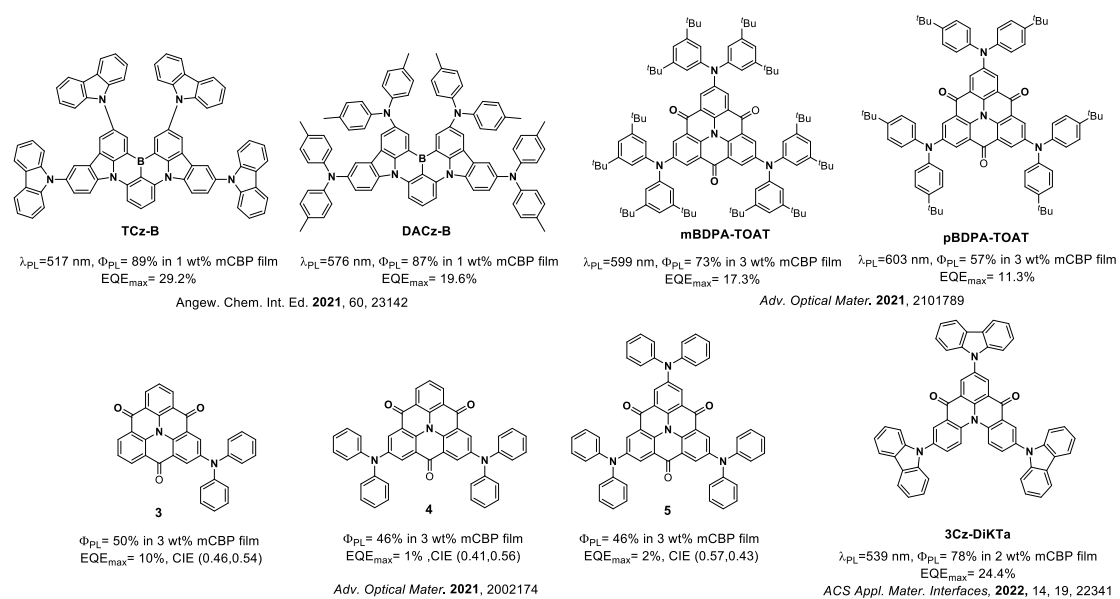

Figure S3. Molecular structures discussed in the introduction.

## X-Ray structure analysis

X-ray diffraction data for **3TPA-DiKTa** and **3DPA-DiKTa** were collected at 173 K using a Rigaku MM-007HF High Brilliance RA generator/confocal optics with XtaLAB P100 or P200 diffractometer [Cu K $\alpha$  radiation ( $\lambda = 1.54187 \text{ \AA}$ )]. Intensity data were collected using either both  $\omega$  and  $\varphi$  steps or solely  $\omega$  steps, accumulating area detector images spanning at least a hemisphere of reciprocal space. Data for both compounds were collected using CrystalClear<sup>[16]</sup> and processed (including correction for Lorentz, polarization and absorption) using CrysAlisPro.<sup>[17]</sup> Structures were solved by dual-space methods (SHELXT)<sup>[18]</sup> and refined by full-matrix least-squares against  $F^2$  (SHELXL-2018/3)<sup>[19]</sup>. Non-hydrogen atoms were refined anisotropically, and hydrogen atoms were refined using a riding model. All crystals of **3TPA-DiKTa** showed very weak diffraction at higher angles, even with long exposures, often showing no diffraction above  $1.10 \text{ \AA}$ . This likely arises from a combination of regions of diffuse solvent in the structure as well as the extent of disorder present. Despite the weak diffraction from this compound, the structure could still be unambiguously determined. Both structures showed some disorder in peripheral phenyl rings, this was extensive in **3TPA-DiKTa**, and extended to one of the phenylene bridges. Disorder modelling included restraints to distances, angles and thermal motion as needed, and several of the disordered peripheral phenyl rings were constrained to an idealised geometry. Thermal ellipsoids in the DiKTa core of **3TPA-DiKTa** suggested that the core might be somewhat disordered as well, however this could not be successfully modelled. Both structures showed regions of void space containing diffuse electron density (**3TPA-DiKTa**:  $218 \text{ \AA}^3$ , **3DPA-DiKTa**:  $283 \text{ \AA}^3$ ) and the SQUEEZE<sup>[20]</sup> routine implemented in PLATON<sup>[21]</sup> was used to remove the contribution to the diffraction pattern of the unordered electron density in the void spaces. Despite treatment with

SQUEEZE, the structure of **3TPA-DiKTa** showed higher than anticipated values of  $R_1$  and  $wR_2$ , likely due to the extent of the disorder and inability to successfully model disorder into the DiKTa core of the molecule. All calculations except SQUEEZE were performed using the Olex2 interface.<sup>[22]</sup> Selected crystallographic data are presented in Table S1. Deposition numbers 2183420 and 2183421 contain the supplementary crystallographic data for this paper. These data are provided free of charge by the joint Cambridge Crystallographic Data Centre and Fachinformationszentrum Karlsruhe Access Structures service [www.ccdc.cam.ac.uk/structures](http://www.ccdc.cam.ac.uk/structures).

**Table S1.** Selected crystallographic data for **3TPA-DiKTa** and **3DPA-DiKTa**.

|                                              | <b>3TPA-DiKTa</b>                                             | <b>3DPA-DiKTa</b>                                                             |
|----------------------------------------------|---------------------------------------------------------------|-------------------------------------------------------------------------------|
| Empirical formula                            | C <sub>74</sub> H <sub>50</sub> N <sub>4</sub> O <sub>2</sub> | C <sub>57</sub> H <sub>40</sub> Cl <sub>2</sub> N <sub>4</sub> O <sub>2</sub> |
| Formula mass                                 | 1027.18                                                       | 883.83                                                                        |
| Colour, habit                                | Red prism                                                     | Red plate                                                                     |
| Crystal size (mm <sup>3</sup> )              | 0.28×0.06×0.04                                                | 0.15×0.04×0.01                                                                |
| Crystal system                               | Triclinic                                                     | Triclinic                                                                     |
| Space group                                  | $P\bar{1}$                                                    | $P\bar{1}$                                                                    |
| a (Å)                                        | 10.9144(11)                                                   | 11.0801(2)                                                                    |
| b (Å)                                        | 17.2054(11)                                                   | 12.5559(2)                                                                    |
| c (Å)                                        | 17.3910(12)                                                   | 17.2089(3)                                                                    |
| $\alpha$ (°)                                 | 66.543(6)                                                     | 88.8930(10)                                                                   |
| $\beta$ (°)                                  | 80.988(7)                                                     | 89.4880(10)                                                                   |
| $\gamma$ (°)                                 | 76.734(7)                                                     | 83.6380(10)                                                                   |
| Volume/Å <sup>3</sup>                        | 2908.2(4)                                                     | 2378.87(7)                                                                    |
| Z                                            | 2                                                             | 2                                                                             |
| $\rho_{\text{calc}}/\text{g cm}^{-3}$        | 1.173                                                         | 1.234                                                                         |
| $\mu/\text{mm}^{-1}$                         | 0.549                                                         | 1.592                                                                         |
| F(000)                                       | 1076                                                          | 920                                                                           |
| Reflections collected                        | 30332                                                         | 28720                                                                         |
| Independent reflections ( $R_{\text{int}}$ ) | 10312 (0.0713)                                                | 9419 (0.0215)                                                                 |
| Parameters, restraints                       | 860, 1360                                                     | 641, 225                                                                      |
| Goodness-of-fit on F <sup>2</sup>            | 1.504                                                         | 1.058                                                                         |
| $R_1 [I > 2\sigma(I)]$                       | 0.1756                                                        | 0.0462                                                                        |
| $R_1$ (all data)                             | 0.2497                                                        | 0.0527                                                                        |
| $wR_2 [I > 2\sigma(I)]$                      | 0.4654                                                        | 0.1309                                                                        |
| $wR_2$ (all data)                            | 0.5199                                                        | 0.1384                                                                        |
| Largest diff. peak/hole / e Å <sup>-3</sup>  | 1.055, -0.361                                                 | 0.300, -0.51                                                                  |

## Calculations

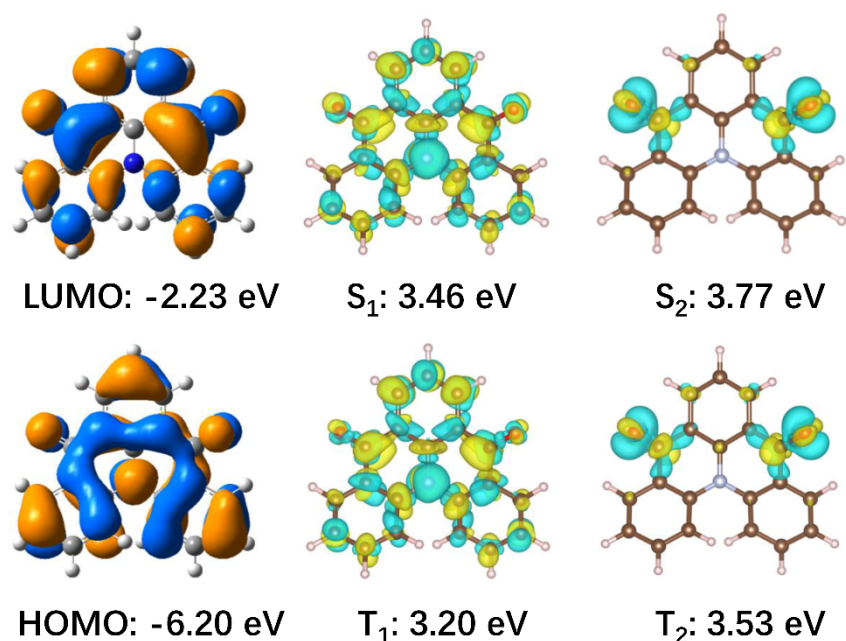

Figure S4. Theoretical calculations for **DiKTa**. HOMO and LUMO orbitals calculated in the gas phase at the PBE0/6-31G(d,p) level and difference density plots of S<sub>1</sub>, S<sub>2</sub>, T<sub>1</sub> and T<sub>2</sub> excited states calculated in the gas phase at the SCS-ADC(2)/cc-pVDZ level.

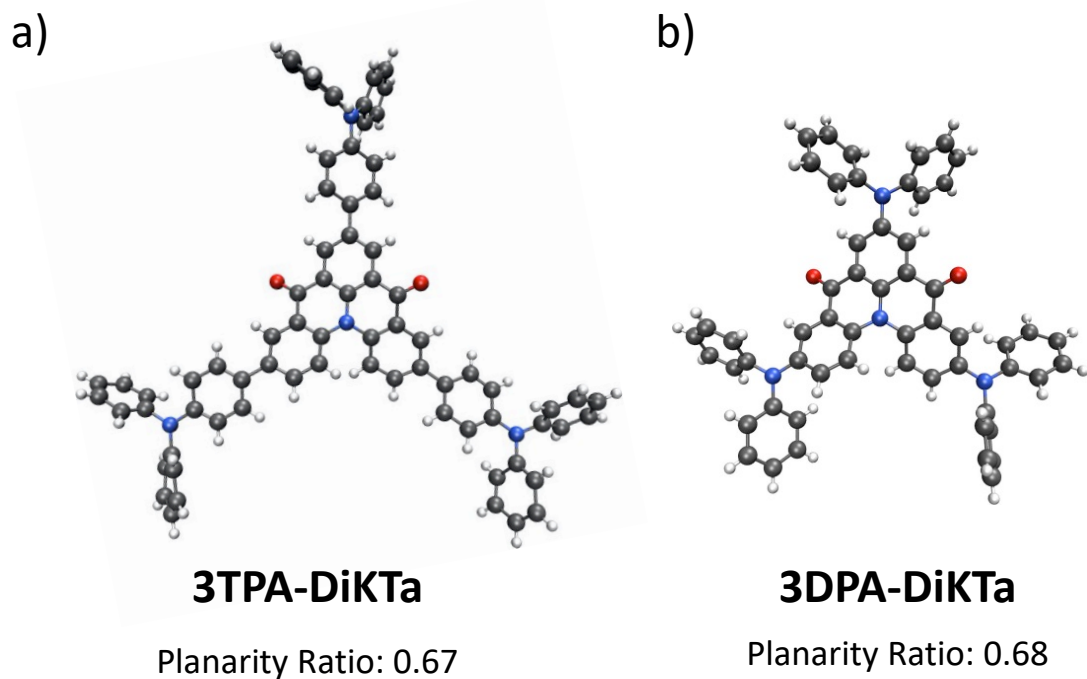

Figure S5. Planarity ratio, calculated at the PBE0/6-31G(d,p) level based on the crystal structure geometry of **3TPA-DiKTa** and **3DPA-DiKTa**.

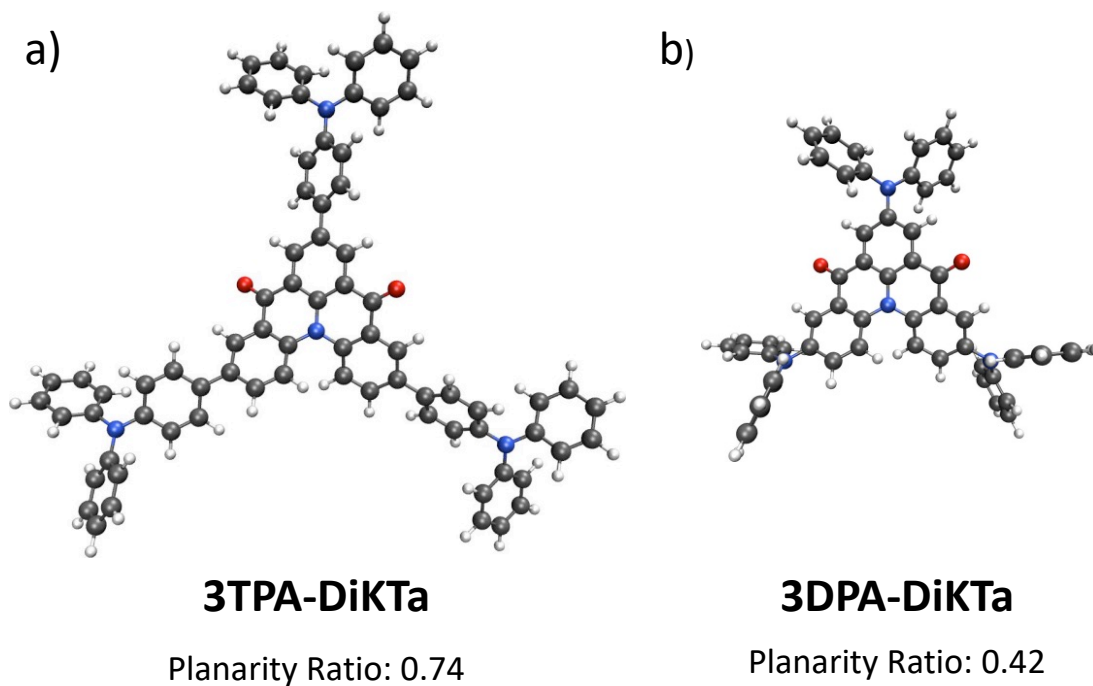

Figure S6. Planarity ratio, calculated at the PBE0/6-31G(d,p) level based on the DFT optimized structures of **3TPA-DiKTa** and **3DPA-DiKTa**.

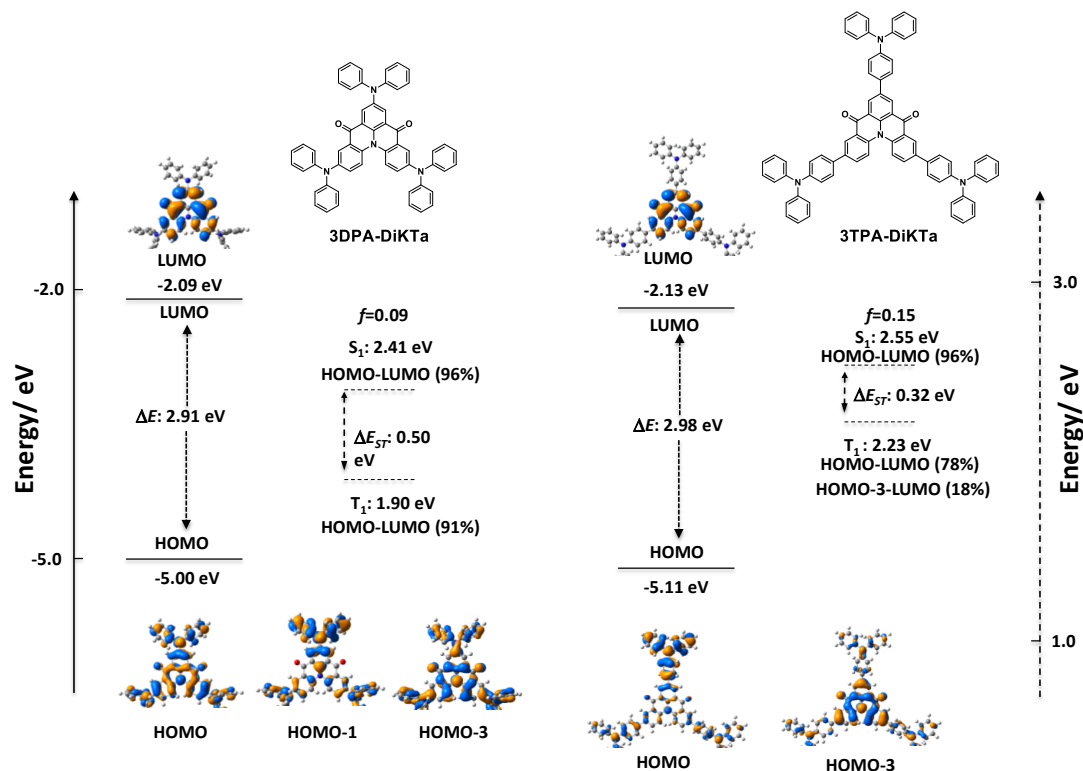

Figure S7. Distributions of the frontier molecular orbitals of **3TPA-DiKTa** and **3DPA-DiKTa**, calculated in the gas phase at the PBE0/6-31G(d,p) level,  $f$  is the oscillator strength.



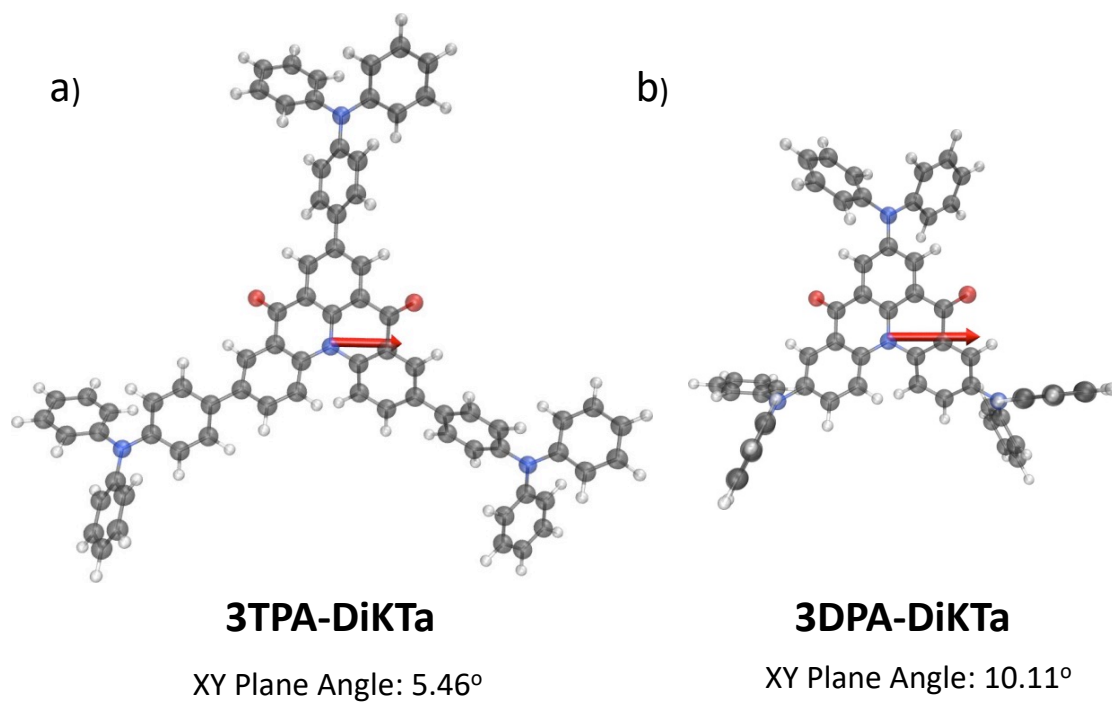

Figure S8. Molecular structures with transition dipole moments (denoted by red arrows) for **3TPA-DiKTa** and **3DPA-DiKTa**, calculated at the PBE0/6-31G(d) level.

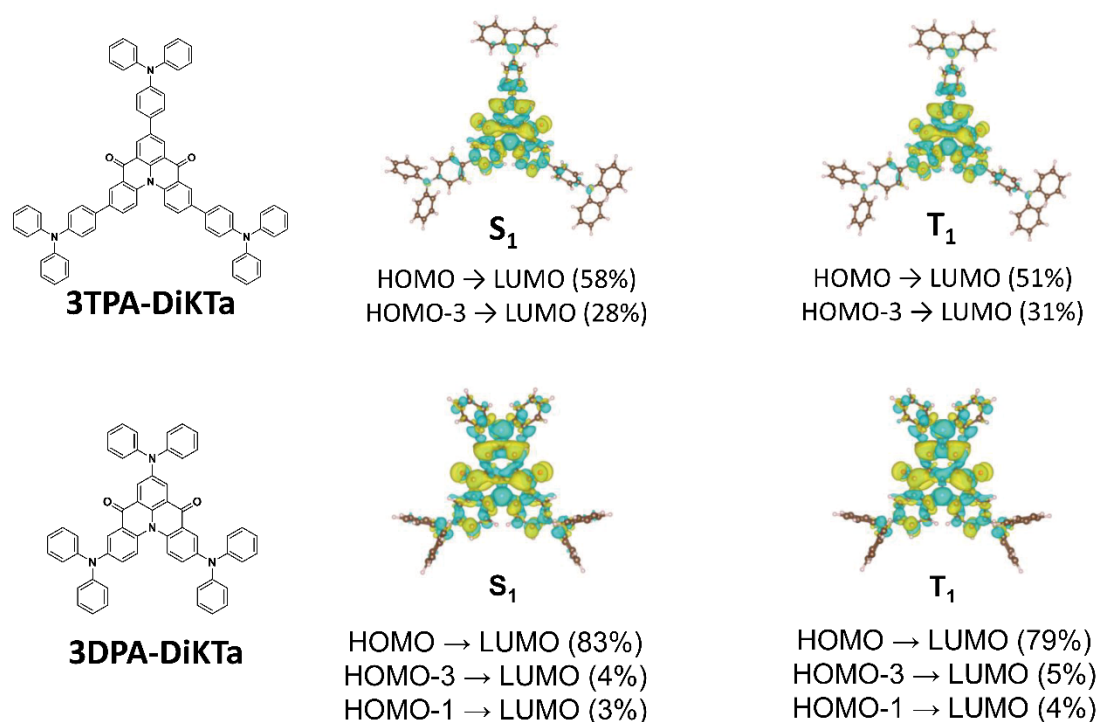

Figure S9. The electronic transition nature calculated using SCS-ADC(2)/cc-pVDZ in the gas phase for **3TPA-DiKTa** and **3DPA-DiKTa**.

Table S2. Calculated data in the gas phase at the PBE0/6-31G(d,p) level.

| Compound   | FMOs / eV                                  | S <sub>1</sub> / eV | T <sub>1</sub> / eV | ΔE <sub>ST</sub> / eV | <i>f</i> |
|------------|--------------------------------------------|---------------------|---------------------|-----------------------|----------|
| 3TPA-DiKTa | H: -5.10; H3: -6.02; L: -2.12              | 2.55                | 2.23                | 0.32                  | 0.09     |
| 3DPA-DiKTa | H: -5.01; H3: -6.52; L: -2.09<br>H1: -5.38 | 2.41                | 1.90                | 0.50                  | 0.15     |

Where H3=HOMO-3, H1=HOMO-1, H=HOMO, L=LUMO.

Table S3. Calculated data calculated in the gas phase at the ADC(2)/cc-pVDZ level.

| Compound          | $S_1/ \text{eV}$          | $S_2/ \text{eV}$          | $T_1/ \text{eV}$          | $T_2/ \text{eV}$          | $DE_{ST}$<br>/ eV | $f$  |
|-------------------|---------------------------|---------------------------|---------------------------|---------------------------|-------------------|------|
|                   | ( $D_{CT} / \text{\AA}$ ) | ( $D_{CT} / \text{\AA}$ ) | ( $D_{CT} / \text{\AA}$ ) | ( $D_{CT} / \text{\AA}$ ) |                   |      |
| <b>3TPA-DiKTa</b> | 3.16<br>(0.28)            | 3.65<br>(0.28)            | 2.93<br>(0.52)            | -                         | 0.23              | 0.29 |
| <b>3DPA-DiKTa</b> | 2.72<br>(0.20)            | 3.28<br>(0.11)            | 2.46<br>(0.11)            | 3.03<br>(0.39)            | 0.26              | 0.18 |

Where  $D_{CT}$  is the distance between the hole and electron density barycentre.

## Synthesis

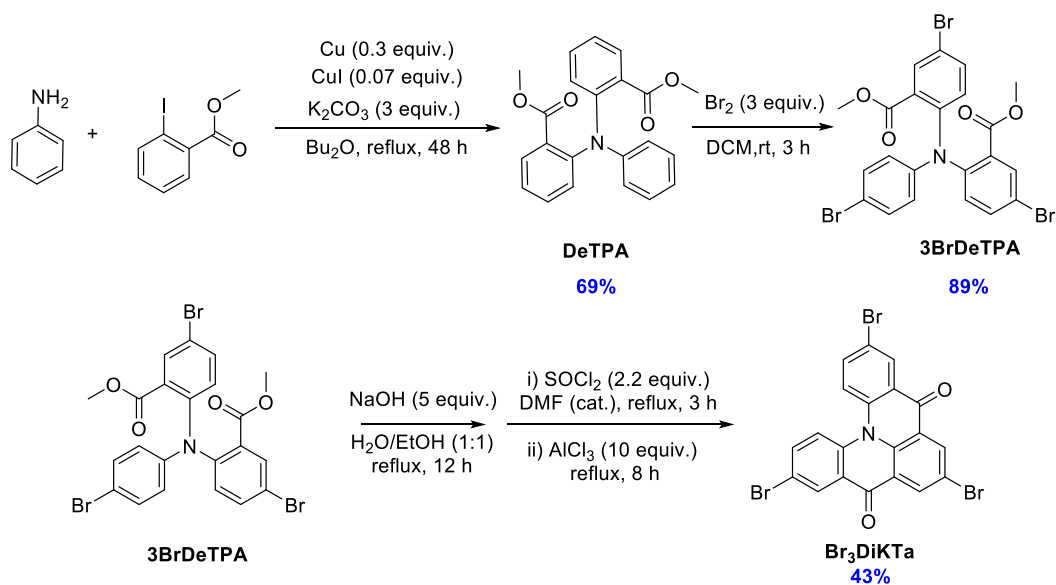

Scheme S1. Synthesis route of **Br<sub>3</sub>DiKTa**.

**Br<sub>3</sub>DiKTa** were synthesised in four steps as shown in Scheme S1, including Ullmann coupling, bromination, hydrolysis and Friedel-Craft acylation reaction. The detailed procedure was described in our previously reported protocol.<sup>[23]</sup>

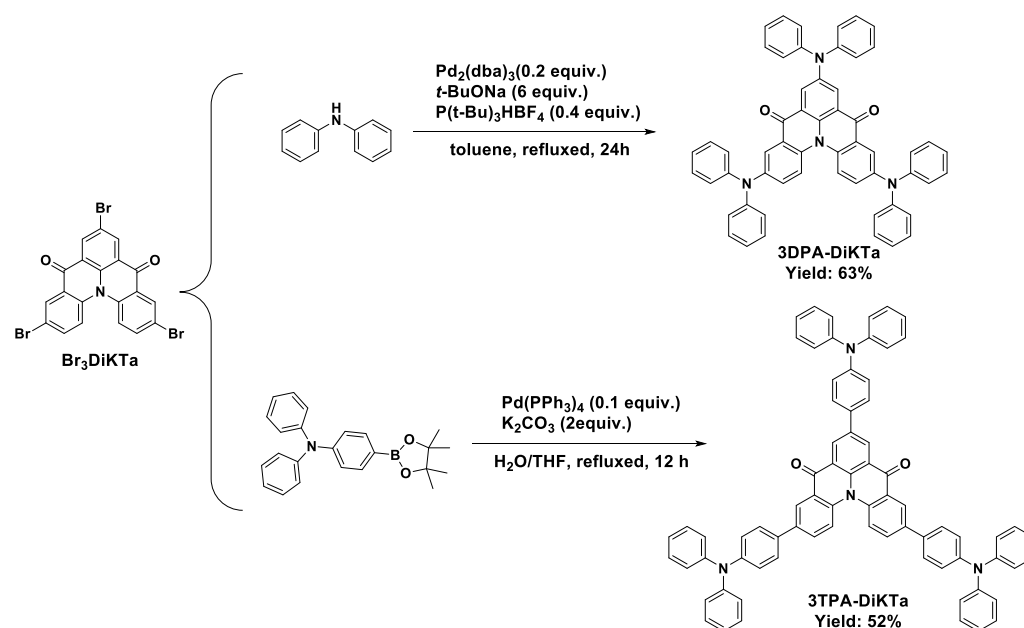

Scheme S2. Synthetic route for **3TPA-DiKTa** and **3DPA-DiKTa**.

### 3,7,11-tris(diphenylamino)quinolino[3,2,1-de]acridine-5,9-dione (3DPA-DiKTa)

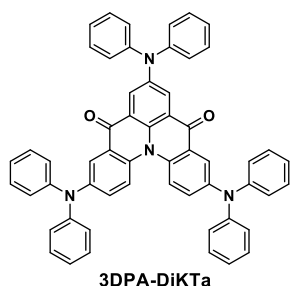

**Br<sub>3</sub>DiKTa** (600 mg, 1.12 mmol 1 equiv.), diphenylamine (856 mg, 5.06 mmol, 4.5 equiv.), Pd<sub>2</sub>(dba)<sub>3</sub> (206 mg, 0.23 mmol, 0.2 equiv.), tri-*tert*-butylphosphonium tetrafluoroborate (91 mg, 0.45 mmol, 0.4 equiv.), sodium *tert*-butoxide (486 mg, 5.06 mmol, 4.5 equiv.) and 15 mL dry toluene were added to a 50 mL Schlenk tube, then placed under a nitrogen atmosphere. The solution was heated at reflux and stirred for 24 h. After cooling to room temperature, 50 mL DCM was added to the reaction mixture. The organic phase was collected and washed with brine (3×50 mL). The solvents were removed under reduced pressure. The crude product was purified by column chromatography on silica gel (EtOAc:hexane = 1:15). The corresponding fractions were combined and concentrated under reduced pressure to afford a deep red solid. **Yield:** 61% (550 mg). **R<sub>f</sub>:** 0.35 (EtOAc:hexane=1:6). **Mp:** 287-289 °C. **<sup>1</sup>H-NMR** (500 MHz, CDCl<sub>3</sub>) δ 8.44 (s, 2H), 8.04 (dd, *J* = 17.4, 6.0 Hz, 4H), 7.42 (dd, *J* = 9.2, 2.8 Hz, 2H), 7.31 (dt, *J* = 10.3, 5.1 Hz, 12H), 7.17 (d, *J* = 7.6 Hz, 8H), 7.14 – 7.09 (m, 8H), 7.08 (d, *J* = 7.4 Hz, 2H). **<sup>13</sup>C-NMR** (126 MHz, CDCl<sub>3</sub>) δ 177.70, 147.10, 146.04, 145.02, 144.17, 134.23, 134.15, 129.70, 129.05, 127.80, 127.06, 126.91, 124.73, 124.41, 124.31, 123.82, 123.76, 121.37, 119.29. **HRMS** (ESI-MS): **[C<sub>56</sub>H<sub>32</sub>N<sub>4</sub>O<sub>2</sub> +Na]<sup>+</sup> Calculated:** 821.2887; **Found:** 821.2885. 97.87% pure by HPLC analysis, retention time 8.3 minutes in 95% Methanol and 5% Water. **Analysis calculated for C<sub>56</sub>H<sub>38</sub>N<sub>4</sub>O<sub>2</sub>:** C, 84.19%; H, 4.79%; N, 7.01 %; **Found.** C, 83.74%, H, 4.84% and 6.63%.

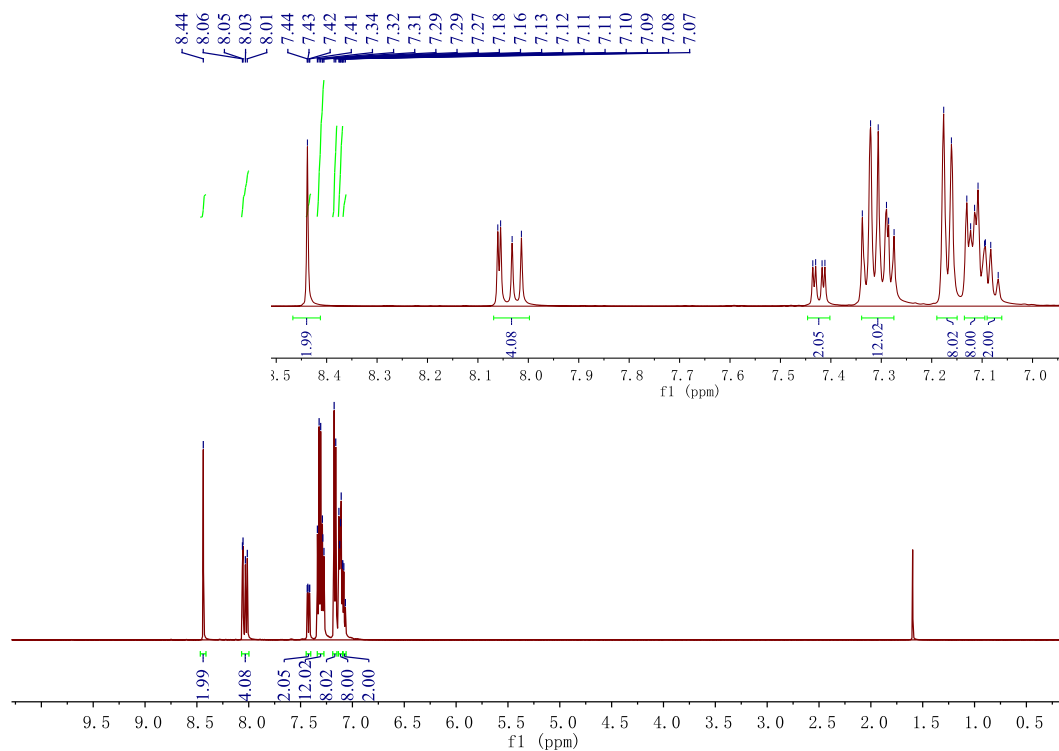

Figure S10.  $^1\text{H-NMR}$  of **3DPA-DiKTa** in  $\text{CDCl}_3$ .

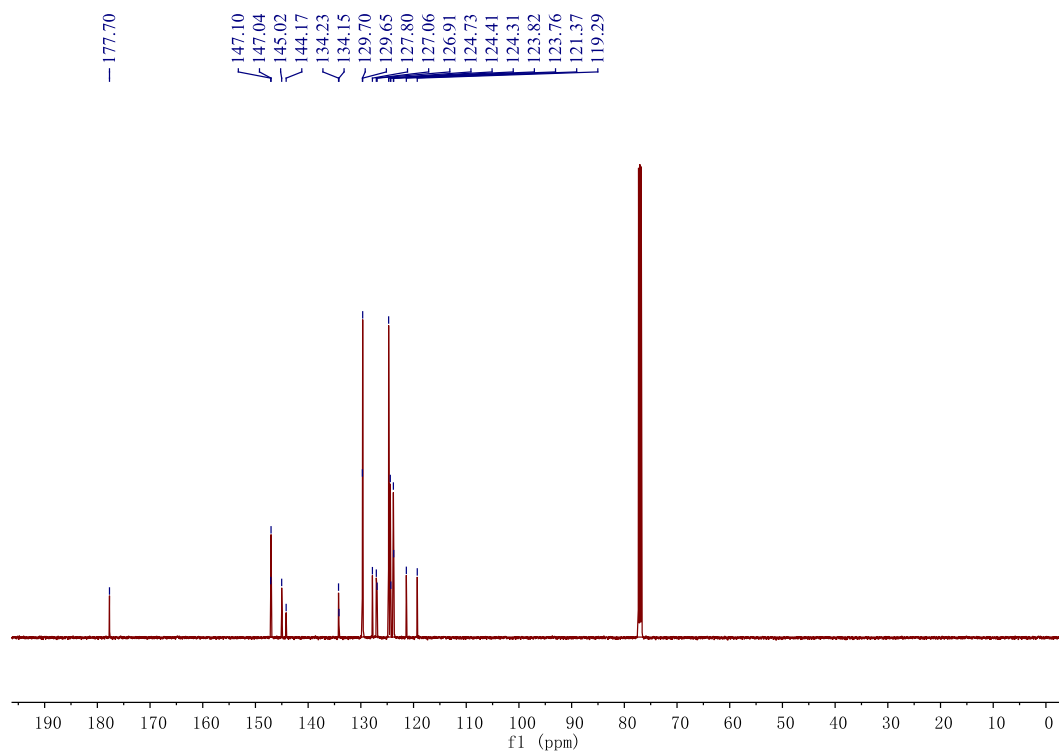

Figure S11.  $^{13}\text{C-NMR}$  of **3DPA-DiKTa** in  $\text{CDCl}_3$ .

## Display Report

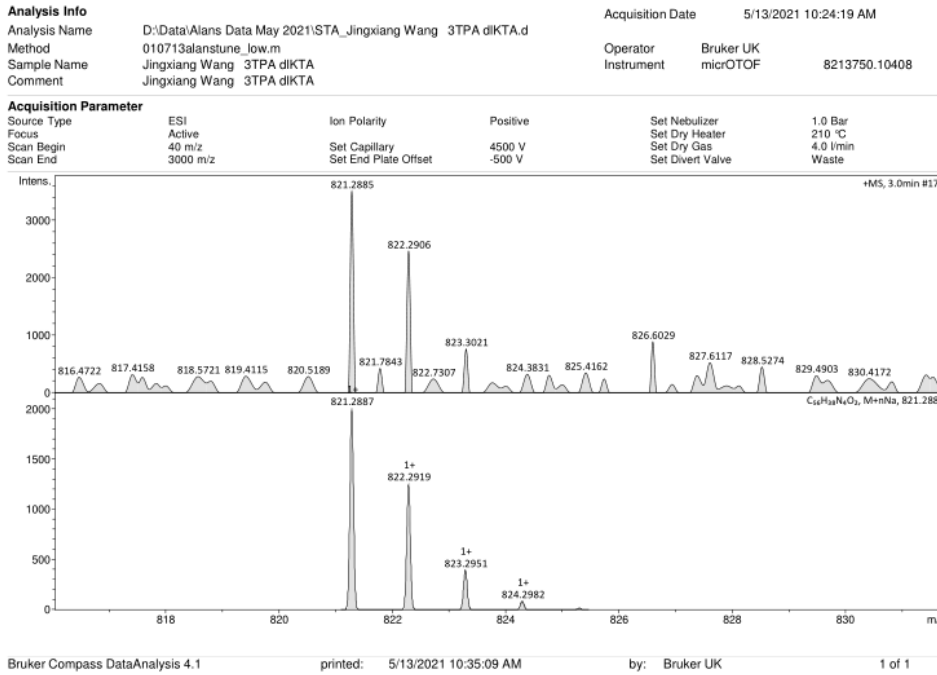

Figure S12. HRMS of 3DPA-DiKTA.

## HPLC Trace Report 03Mar2022

### <Sample Information>

|                  |                                    |              |                        |
|------------------|------------------------------------|--------------|------------------------|
| Sample Name      | : 3dpa-2                           | Sample Type  | : Unknown              |
| Sample ID        | :                                  |              |                        |
| Method Filename  | : 95% Methanol 5 Water 20 mins.lcm |              |                        |
| Batch Filename   | : 3dpa.lcb                         |              |                        |
| Vial #           | : 1-9                              |              |                        |
| Injection Volume | : 10 uL                            |              |                        |
| Date Acquired    | : 03/03/2022 12:10:11              | Acquired by  | : System Administrator |
| Date Processed   | : 03/03/2022 14:36:34              | Processed by | : System Administrator |

### <Chromatogram>

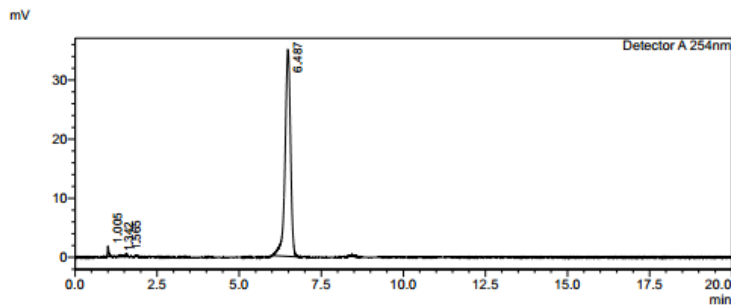

### <Peak Table>

| Peak# | Ret. Time | Area   | Height | Area%   | Area/Height | Width at 5% Height |
|-------|-----------|--------|--------|---------|-------------|--------------------|
| 1     | 1.005     | 4826   | 1721   | 1.170   | 2.805       | 0.119              |
| 2     | 1.342     | 2245   | 269    | 0.544   | 8.357       | --                 |
| 3     | 1.565     | 1678   | 469    | 0.407   | 3.578       | --                 |
| 4     | 6.487     | 403725 | 34911  | 97.879  | 11.564      | 0.429              |
| Total |           | 412474 | 37369  | 100.000 |             |                    |

Figure S13. HPLC of 3DPA-DiKTA with 95% Methanol and 5% water.

## Elemental Analysis Service Request Form

Researcher name Sen Wu

Researcher email ws60@st-andrews.ac.uk

NOTE: Please submit ca. 10 mg of sample

|                         |            |
|-------------------------|------------|
| Sample reference number | WS-1160    |
| Name of Compound        | 3DPA-DiKTa |
| Molecular formula       | C56H38N4O2 |
| Stability               |            |
| Hazards                 |            |
| Other Remarks           |            |

Analysis type:

Single  Duplicate  Triplicate

Analysis Result:

| Element  | Expected % | Found (1) | Found (2) | Found (3) |
|----------|------------|-----------|-----------|-----------|
| Carbon   | 84.19      | 83.49     | 83.74     |           |
| Hydrogen | 4.79       | 4.79      | 4.84      |           |
| Nitrogen | 7.01       | 6.60      | 6.63      |           |
| Oxygen   |            |           |           |           |

Authorising Signature:

|                |          |
|----------------|----------|
| Date completed | 15.12.21 |
| Signature      | S-P      |
| comments       |          |

Figure S14. Elemental analysis of 3DPA-DiKTa.

### 3,7,11-tris(4-(diphenylamino)phenyl)quinolino[3,2,1-de]acridine-5,9-dione (3TPA-DiKTa)

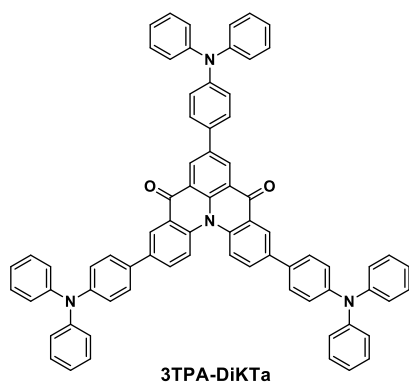

Under a nitrogen atmosphere, to **Br<sub>3</sub>DiKTa** (400 mg, 0.75 mmol 1 equiv.) were added *N,N*-diphenyl-4-(4,4,5,5-tetramethyl-1,3,2-dioxaborolan-2-yl)aniline (973 mg, 2.62 mmol, 3.5 equiv.), THF (15 mL) and NaOH<sub>aq</sub> (2 M, 1.5 mL). Under a positive flow of



nitrogen, Pd(PPh<sub>3</sub>)<sub>4</sub> (43 mg, 0.05 mmol, 0.05 equiv.) was added and the solution was then heated at reflux for 12 h. The reaction was cooled to room temperature and diluted with DCM (150 mL). The organic layer was washed with water (3 × 50 mL) and then dried with anhydrous sodium sulfate. The solvents were removed under reduced pressure. The crude product was purified by column chromatography on silica gel (EtOAc:hexane = 1:15). The corresponding fractions were combined and concentrated under reduced pressure to afford bright yellow solid. **Yield:** 52% (400 mg) **R<sub>f</sub>:** 0.30 (EtOAc:hexane = 1:5) **Mp** > 400 °C. **<sup>1</sup>H-NMR** (500 MHz, CDCl<sub>3</sub>) δ 9.00 (s, 2H), 8.73 (d, J = 2.2 Hz, 2H), 8.25 (d, J = 8.9 Hz, 2H), 7.95 (dd, J = 8.8, 2.2 Hz, 2H), 7.72 (d, J = 8.6 Hz, 2H), 7.65 (d, J = 8.6 Hz, 4H), 7.33 (t, J = 7.8 Hz, 12H), 7.24 – 7.17 (m, 18H), 7.10 (t, J = 7.3 Hz, 6H). **<sup>13</sup>C-NMR** (126 MHz, CDCl<sub>3</sub>) δ 178.69, 148.07, 147.98, 147.48, 138.25, 137.79, 137.51, 136.17, 132.31, 131.86, 130.76, 130.31, 129.41, 127.85, 127.65, 126.58, 124.77, 123.86, 123.53, 123.33, 120.92. **HRMS** (ESI-MS): **[C<sub>74</sub>H<sub>50</sub>N<sub>4</sub>O<sub>2</sub> + H]<sup>+</sup> Calculated:** 1027.4007; **Found:** 1027.3996. **Analysis calculated for C<sub>74</sub>H<sub>50</sub>N<sub>4</sub>O<sub>2</sub>:** C, 86.52%; H, 4.91%; N, 5.45%; **Found.** C, 86.94, H, 4.90% and 5.53%.

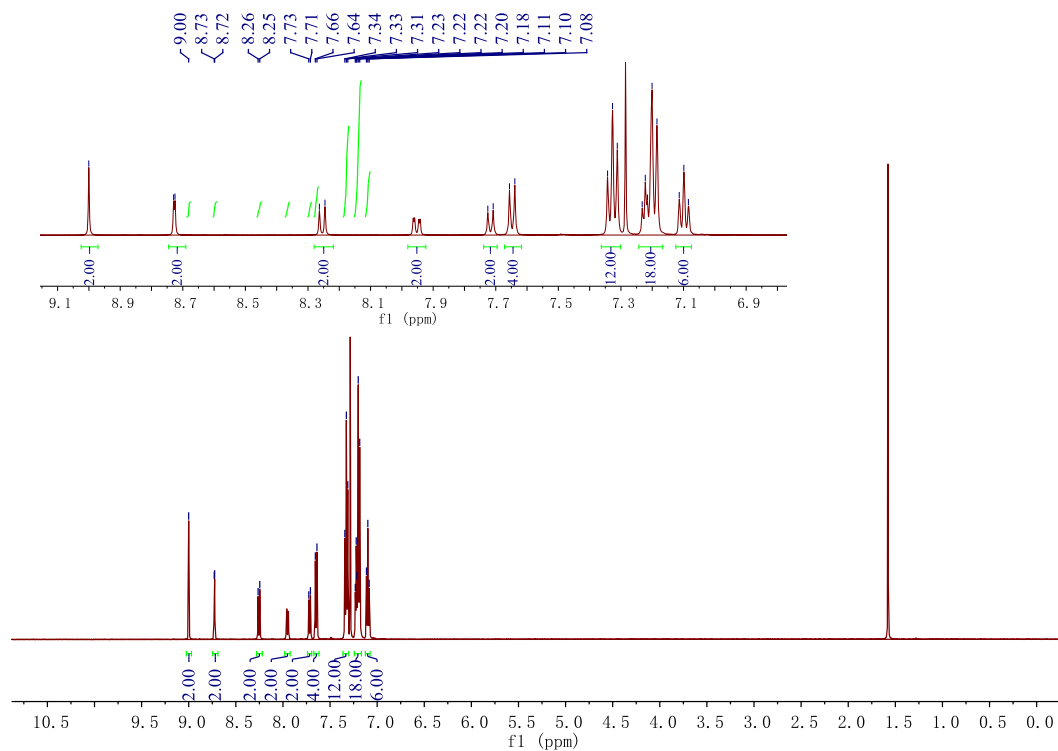

Figure S15.  $^1\text{H-NMR}$  of **3TPA-DiKTa** in  $\text{CDCl}_3$ .

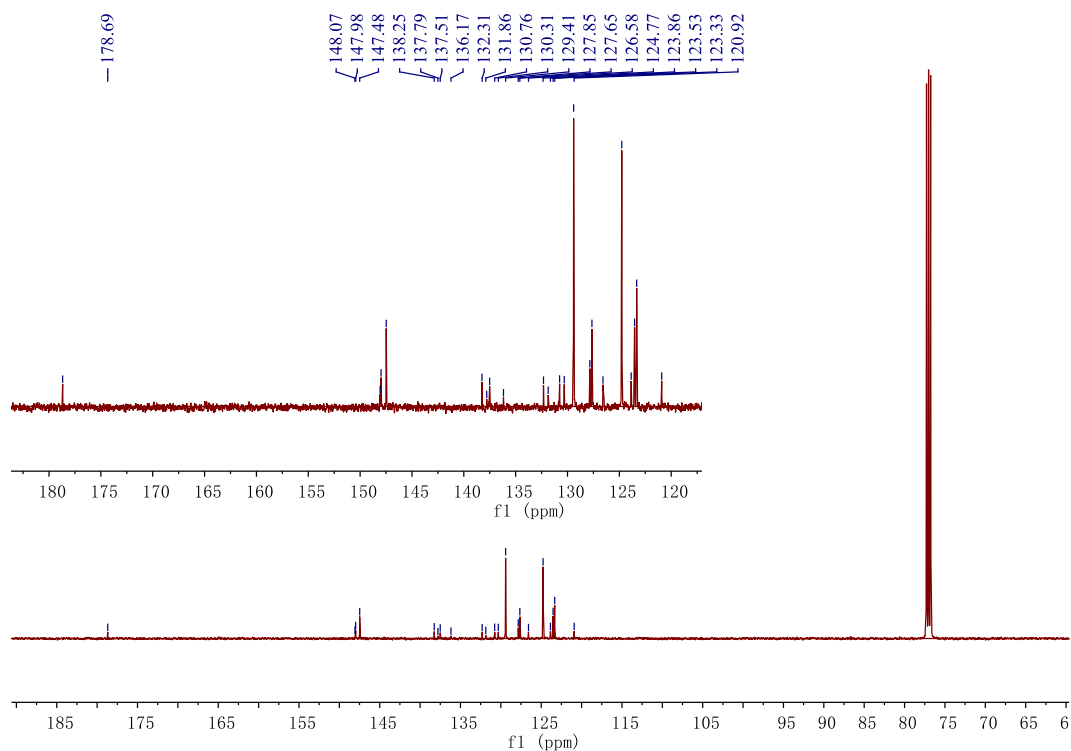

Figure S16.  $^{13}\text{C-NMR}$  of **3TPA-DiKTa** in  $\text{CDCl}_3$ .

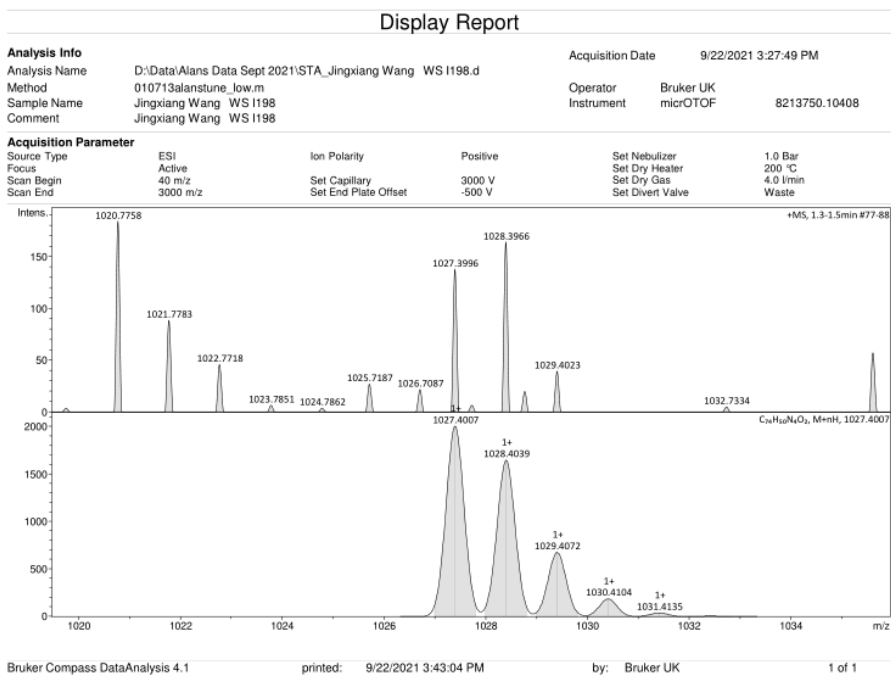

Figure S17. HRMS of 3TPA-DiKTa.

|                          |                                    |
|--------------------------|------------------------------------|
| <b>Molecular formula</b> | C74H50N4O2                         |
| <b>Stability</b>         | Stable in air and in most solvents |
| <b>Hazards</b>           |                                    |
| <b>Other Remarks</b>     |                                    |

**Analysis type:**

Single  Duplicate  Triplicate

**Analysis Result:**

| Element  | Expected % | Found (1) | Found (2) | Found (3) |
|----------|------------|-----------|-----------|-----------|
| Carbon   | 86.52      | 86.94     | 85.04     |           |
| Hydrogen | 4.91       | 4.90      | 4.89      |           |
| Nitrogen | 5.45       | 5.53      | 5.37      |           |
| Oxygen   |            |           |           |           |

**Authorising Signature:**

|                       |          |
|-----------------------|----------|
| <b>Date completed</b> | 21.03.22 |
| <b>Signature</b>      | S-PC     |
| <b>comments</b>       |          |

Figure S18. Elemental Analysis of 3TPA-DiKTa.

## Optoelectronic characterization

Table S4. Electrochemical data

|                   | $E_{\text{ox}}/\text{V}^{\text{a}}$ | $E_{\text{red}}/\text{V}^{\text{a}}$ | HOMO / eV <sup>b</sup> | LUMO / eV <sup>b</sup> |
|-------------------|-------------------------------------|--------------------------------------|------------------------|------------------------|
| <b>DiKTa</b>      | 1.78                                | -1.34                                | -6.12                  | -3.00                  |
| <b>3TPA-DiKTa</b> | 0.93                                | -1.36                                | -5.27                  | -2.98                  |
| <b>3DPA-DiKTa</b> | 0.79                                | -1.33                                | -5.13                  | -3.01                  |

$E_{\text{ox}}$  and  $E_{\text{red}}$  are the peak of anodic and cathodic potentials from DPV relative to Fc/Fc<sup>+</sup>. In degassed DCM with 0.1 M [nBu<sub>4</sub>N]PF<sub>6</sub> as the supporting electrolyte and Fc/Fc<sup>+</sup> as the internal reference (0.46 V vs. SCE).<sup>[1, 24]</sup> <sup>b</sup> $E_{\text{HOMO/LUMO}} = -(E_{\text{ox}} / E_{\text{red}} + 4.8)$  eV.

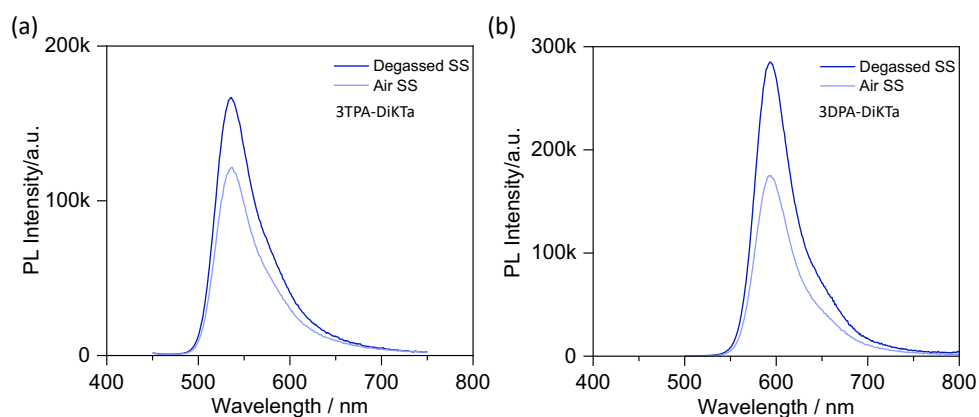

Figure S19. Comparison of the steady-state PL in both aerated and degassed toluene of (a) **3TPA-DiKTa** and (b) **3DPA-DiKTa** ( $\lambda_{\text{exc}} = 340$  nm).

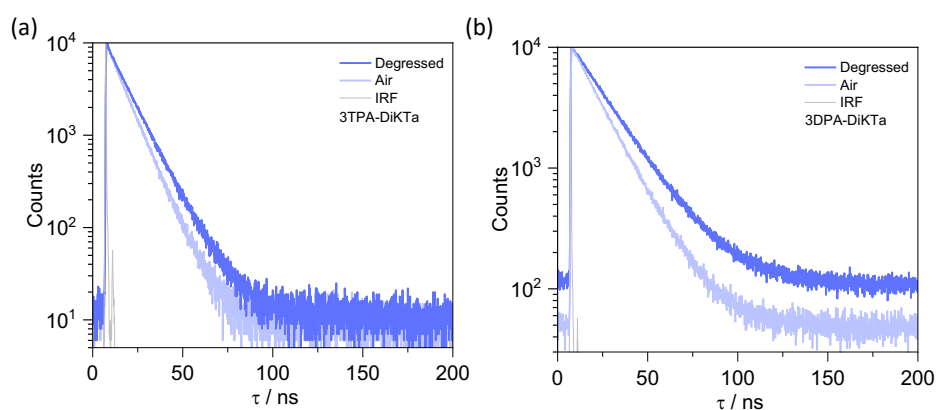

Figure S20. Comparison of PL decay in both aerated and degassed toluene of (a) **3TPA-DiKTa** and (b) **3DPA-DiKTa** ( $\lambda_{\text{exc}} = 375$  nm).

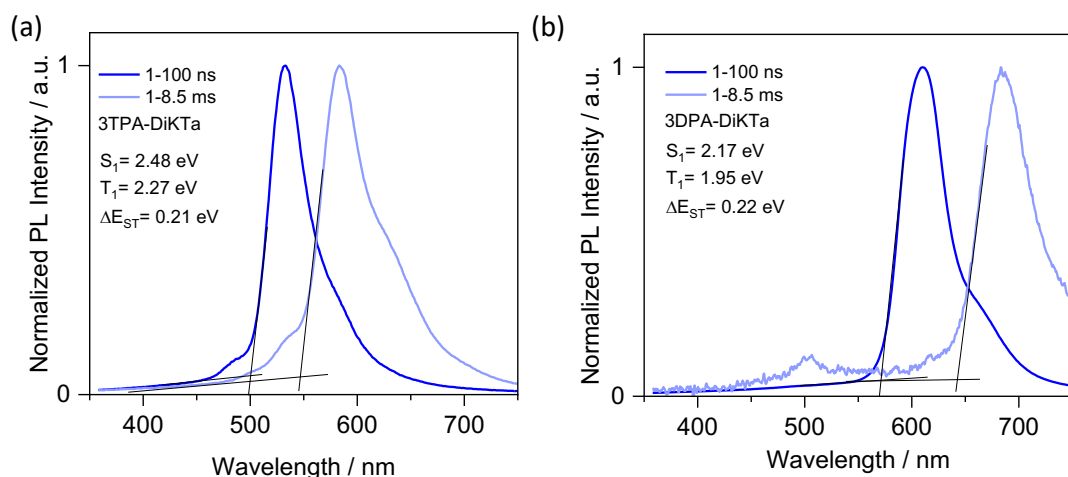

Figure S21. Prompt PL (1-100 ns) and phosphorescence spectra (1-8.5 ms) obtained in 2-MeTHF glass at 77 K for (a) **3TPA-DiKTa** and (b) **3DPA-DiKTa** ( $\lambda_{exc} = 343$  nm).

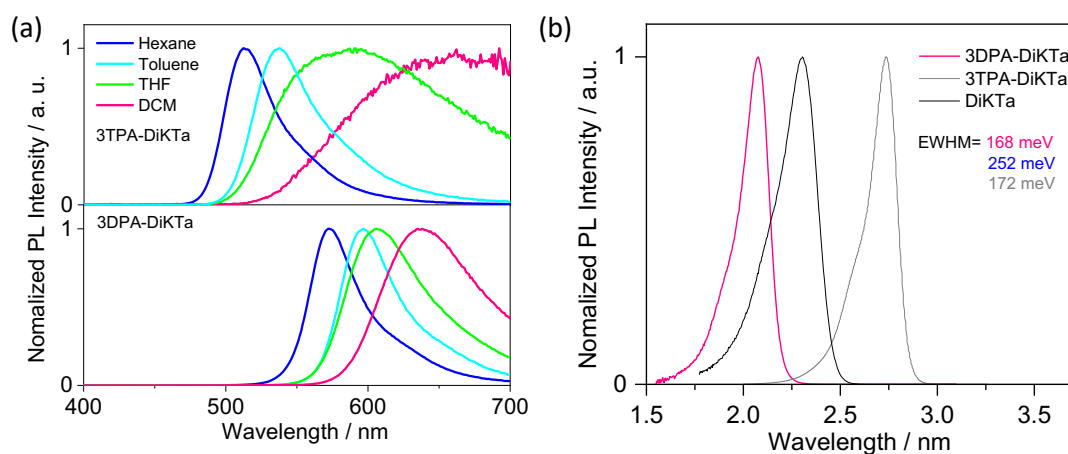

Figure S22. (a) Solvatochromatic PL study for **3TPA-DiKTa** and **3DPA-DiKTa**. ( $\lambda_{exc} = 340$  nm), (b) The PL spectra of **DiKTa**, **3TPA-DiKTa** and **3DPA-DiKTa** after Jacobian transformation.<sup>[25]</sup>

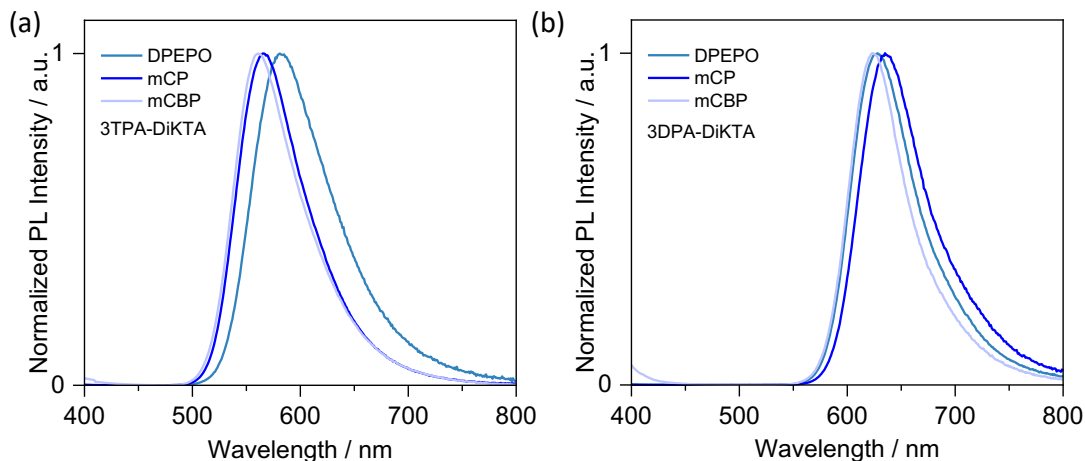

Figure S23. PL of doped film in different host matrices (2 wt%) for (a) **3TPA-DiKTA** and (b) **3DPA-DiKTA**, ( $\lambda_{exc} = 340$  nm).

Table S5. Photoluminescence quantum yield screening in different host matrices.

| PLQY <sup>b</sup> |           |           |           |
|-------------------|-----------|-----------|-----------|
| Host <sup>a</sup> | mCP       | mCBP      | DPEPO     |
| <b>3TPA-DiKTA</b> | 87% (68%) | 75% (67%) | 64% (54%) |
| <b>3DPA-DiKTA</b> | 60% (52%) | -         | 46% (37%) |

<sup>a</sup> Thin films were prepared by spin-coating with 2 wt% in each host; <sup>b</sup>  $\Phi_{PL}$  values were determined using an integrating sphere ( $\lambda_{exc} = 305$  nm or 340 nm); degassing was done by N<sub>2</sub> purge (value given inside parentheses in the presence of O<sub>2</sub>).  $\Phi_{PL}$  values are within an error limit of  $\pm 2\%$ .

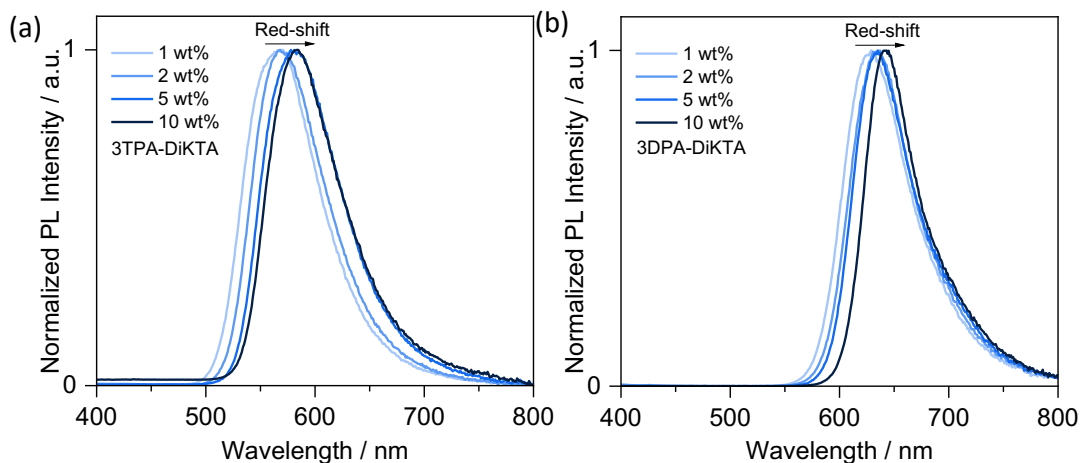

Figure S24. Concentration-dependent PL of (a) **3TPA-DiKTA** and (b) **3DPA-DiKTA** in mCP,  $\lambda_{exc} = 340$  nm.

Table S6. Photoluminescence quantum yield screening at different doping concentrations in spin-coated mCP thin films.<sup>a</sup>

| $\Phi_{\text{PL}}^a$ | 1 wt%        | 2 wt%        | 5 wt%        | 10 wt%       |
|----------------------|--------------|--------------|--------------|--------------|
| <b>3TPA-DiKTa</b>    | 81%<br>(69%) | 87%<br>(68%) | 76%<br>(68%) | 71%<br>(66%) |
| <b>3DPA-DiKTa</b>    | 65%<br>(55%) | 60%<br>(52%) | 51%<br>(44%) | 49%<br>(42%) |

<sup>a</sup>  $\Phi_{\text{PL}}$  values were determined using an integrating sphere ( $\lambda_{\text{exc}} = 305 \text{ nm}$  or  $340 \text{ nm}$ ); degassing was done by  $\text{N}_2$  purge (value given inside parentheses in the presence of  $\text{O}_2$ ).  $\Phi_{\text{PL}}$  values are within an error limit of  $\pm 2\%$ .

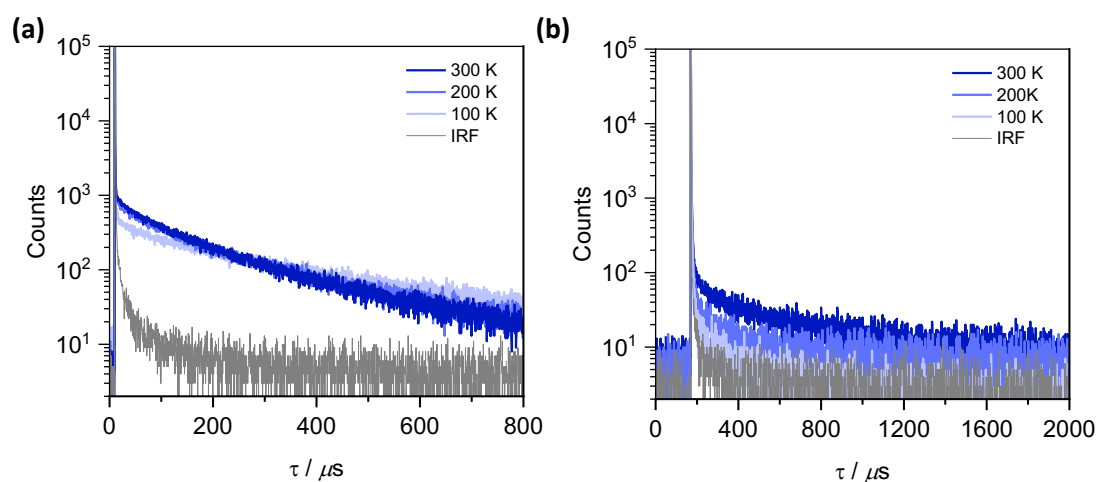

Figure S25. Temperature-dependent time-resolved PL decay of (a) **3TPA-DiKTa** and (b) **3DPA-DiKTa** in 2 wt% mCP,  $\lambda_{\text{exc}} = 379 \text{ nm}$ .

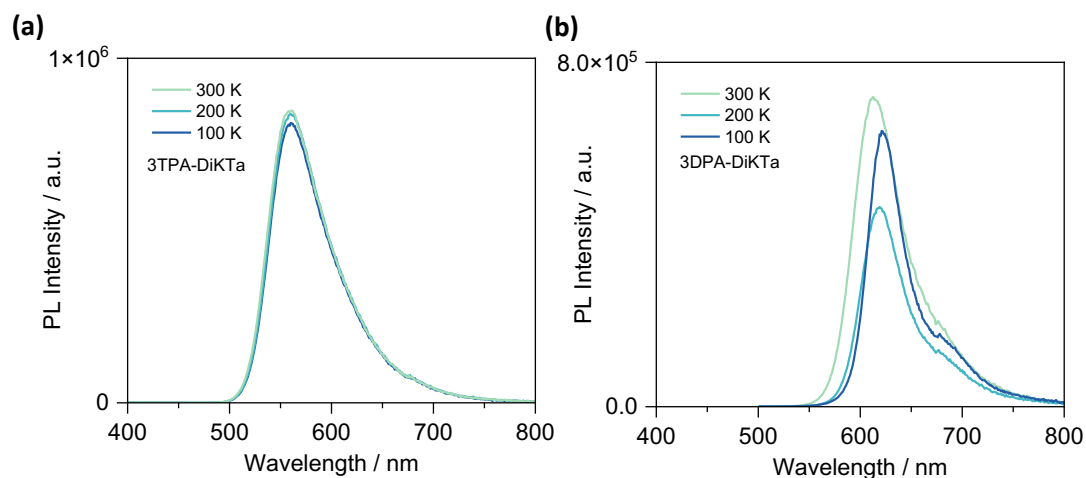

Figure S26. Temperature-dependent steady-state PL spectra in 2 wt% mCP of (a)

**3TPA-DiKTa** and (b) **3DPA-DiKTa**.  $\lambda_{\text{exc}} = 340$  nm.

For a TADF system, the main exciton loss channels are either singlet or triplet nonradiative transition processes. Owing to high performance, the singlet nonradiative transition process ( $k_{\text{nr}}^{\text{S}}$ ) can be ignored, therefore the exciton loss can be attributed to the triplet nonradiative transition process ( $k_{\text{nr}}^{\text{T}}$ ). The kinetic parameters were calculated according to the following equations and summarized in Table S7.<sup>[26]</sup>

$$\Phi_{\text{PL}} = \Phi_{\text{p}} + \Phi_{\text{d}} \quad (1)$$

$$k_{\text{p}} = \frac{1}{\tau_{\text{p}}} \quad (2)$$

$$k_{\text{d}} = \frac{1}{\tau_{\text{d}}} \quad (3)$$

$$k_{\text{r}}^{\text{S}} = k_{\text{p}}\Phi_{\text{p}} \quad (4)$$

$$k_{\text{ISC}} = k_{\text{p}}(1 - \Phi_{\text{p}}) \quad (5)$$

$$k_{\text{RISC}} = \frac{k_{\text{p}}k_{\text{d}}\Phi_{\text{d}}}{k_{\text{ISC}}\Phi_{\text{p}}} \quad (6)$$

$$k_{\text{nr}}^{\text{T}} = k_{\text{d}} - \Phi_{\text{p}}k_{\text{RISC}} \quad (7)$$

Where the  $\Phi_{\text{p}}$  and  $\Phi_{\text{d}}$  are the prompt fluorescent and delayed fluorescent quantum efficiency;  $k_{\text{p}}$  is the rate constant of prompt fluorescence;  $k_{\text{d}}$  is the rate constant of delayed fluorescence;  $k_{\text{r}}^{\text{S}}$  is the radiative decay rate constant of  $\text{S}_1$ ;  $k_{\text{nr}}^{\text{T}}$  is the non-radiative decay rate constant of  $\text{T}_1$ ;  $k_{\text{ISC}}$  is the intersystem crossing rate constant;  $k_{\text{RISC}}$  is the reverse intersystem crossing rate constant.

**Table S7.** Summary of kinetics parameters of 2 wt% films of **3TPA-DiKTa** and **3DPA-DiKTa** in mCP.

| Compounds         | $\Phi_{\text{P}}$<br>/% | $\Phi_{\text{d}}$<br>/% | $k_{\text{p}}$<br>[ $10^7 \text{ s}^{-1}$ ] | $k_{\text{d}}$<br>[ $10^3 \text{ s}^{-1}$ ] | $k_{\text{r}}^{\text{S}}$<br>[ $10^7 \text{ s}^{-1}$ ] | $k_{\text{nr}}^{\text{T}}$<br>[ $10^3 \text{ s}^{-1}$ ] | $k_{\text{ISC}}$<br>[ $10^7 \text{ s}^{-1}$ ] | $k_{\text{RISC}}$<br>[ $10^4 \text{ s}^{-1}$ ] |
|-------------------|-------------------------|-------------------------|---------------------------------------------|---------------------------------------------|--------------------------------------------------------|---------------------------------------------------------|-----------------------------------------------|------------------------------------------------|
| <b>3DPA-DiKTa</b> | 49                      | 11                      | 6.25                                        | 3.10                                        | 3.06                                                   | 2.43                                                    | 3.19                                          | 0.14                                           |
| <b>3TPA-DiKTa</b> | 28                      | 65                      | 7.14                                        | 7.63                                        | 1.98                                                   | 0.74                                                    | 5.17                                          | 2.49                                           |



## OLED results:

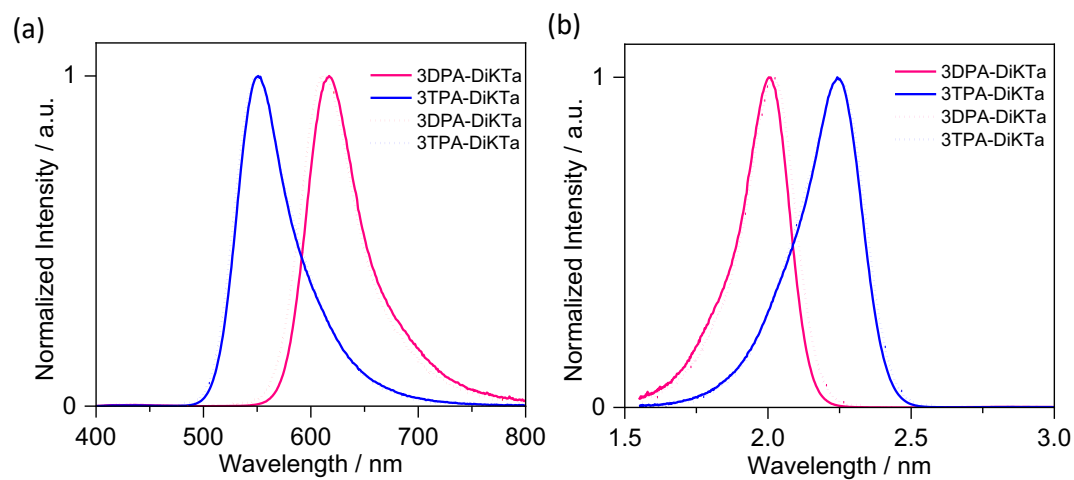

Figure S27. The comparison of PL (short dot) and EL (solid) spectra in 2 wt% doped film: (a) Normal spectra and (b) Jacobian transformation spectra.

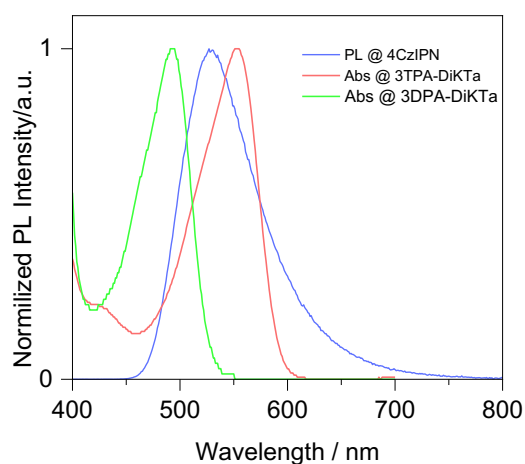

Figure S28. UV/vis absorption spectrum of **3DPA-DiKTa** and **3TPA-DiKTa** in toluene at a concentration of  $10^{-5}$  M and PL spectrum of 10 wt% 4CzIPN : mCP doped film.

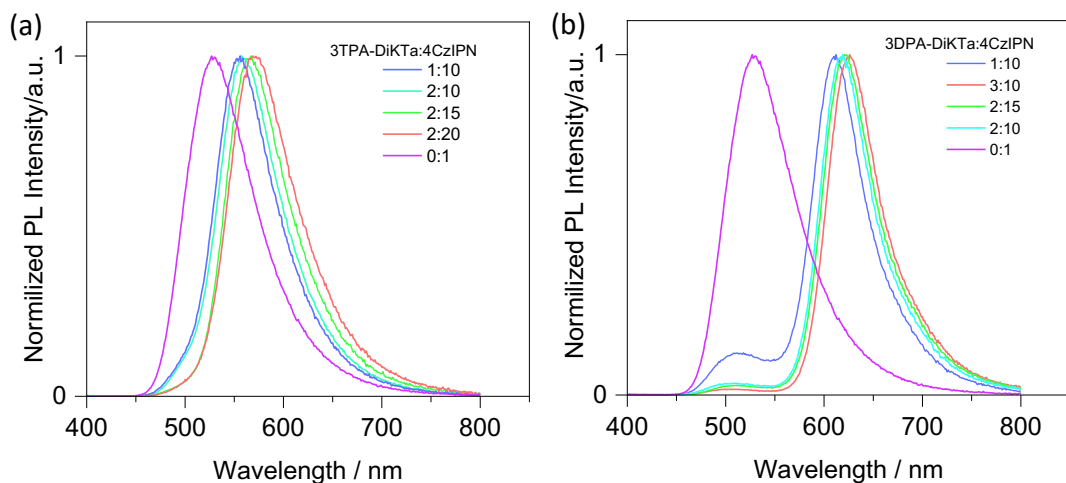

Figure S29. PL spectra of different doped concentration films of **3TPA-DiKTa** and **3DPA-DiKTa** with 4CzIPN in mCP host.

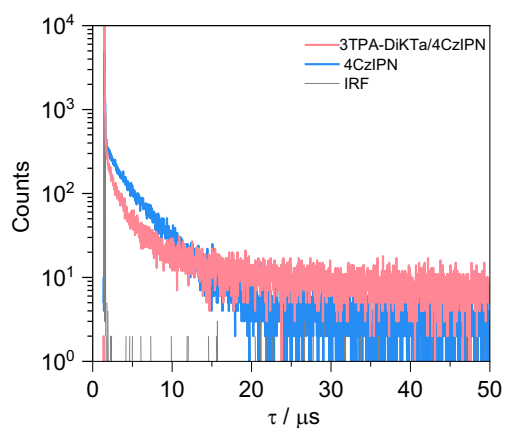

Figure S30. Time-resolved PL decay of 2 wt% **3TPA-DiKTa**:10 wt% 4CzIPN: mCP doped film.

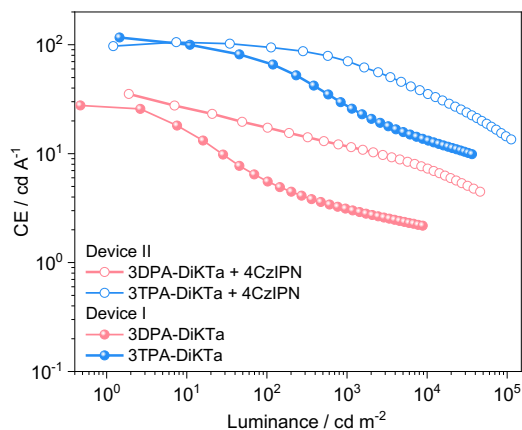

Figure S31. Current efficiency versus luminance curves for devices of **3DPA-DiKTa** and **3TPA-DiKTa** emitters in mCP host fabricated by thermal evaporation. Device **I** stack: ITO/HATCN (5 nm)/TAPC (40 nm)/TCTA (10 nm)/mCP (10 nm)/emissive layer (2 wt% emitter in mCP, 20 nm)/TmPyPB (50 nm)/LiF (0.6 nm)/Al (100 nm). Device **II** stack: ITO/HATCN (5 nm)/TAPC (40 nm)/TCTA (10 nm)/mCP (10 nm)/emissive layer (10wt% 4CzIPN and 2 wt% emitter in mCP, 20 nm)/TmPyPB (50 nm)/LiF (0.6 nm)/Al (100 nm)

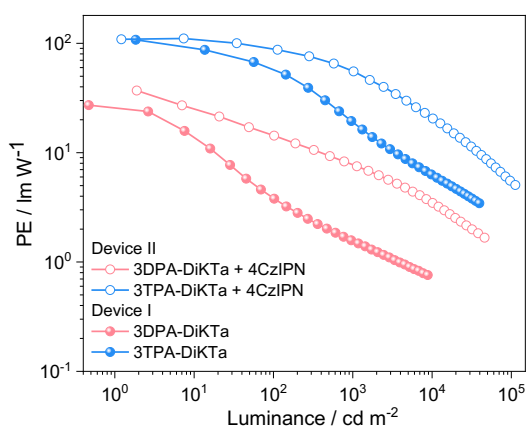

Figure S32. Power efficiency versus luminance curves for devices of **3DPA-DiKTa** and **3TPA-DiKTa** emitters in mCP host fabricated by thermal evaporation. Device **I** stack: ITO/HATCN (5 nm)/TAPC (40 nm)/TCTA (10 nm)/mCP (10 nm)/emissive layer (2 wt% emitter in mCP, 20 nm)/TmPyPB (50 nm)/LiF (0.6 nm)/Al (100 nm). Device **II** stack: ITO/HATCN (5 nm)/TAPC (40 nm)/TCTA (10 nm)/mCP (10 nm)/emissive layer (10wt% 4CzIPN and 2 wt% emitter in mCP, 20 nm)/TmPyPB (50 nm)/LiF (0.6 nm)/Al (100 nm)

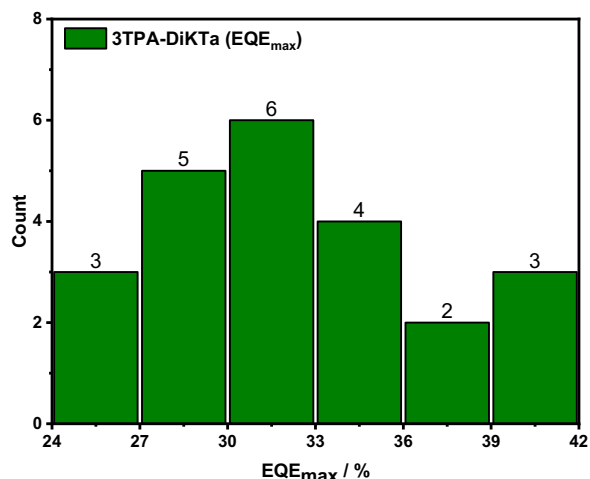

Figure S33. EQE histogram of 23 **3TPA-DiKTa**. Device stack; ITO/HATCN (5 nm)/TAPC (40 nm)/TCTA (10 nm)/mCP (10 nm)/emissive layer (20 nm)/TmPyPB (50 nm)/LiF (0.6 nm)/Al (100 nm).

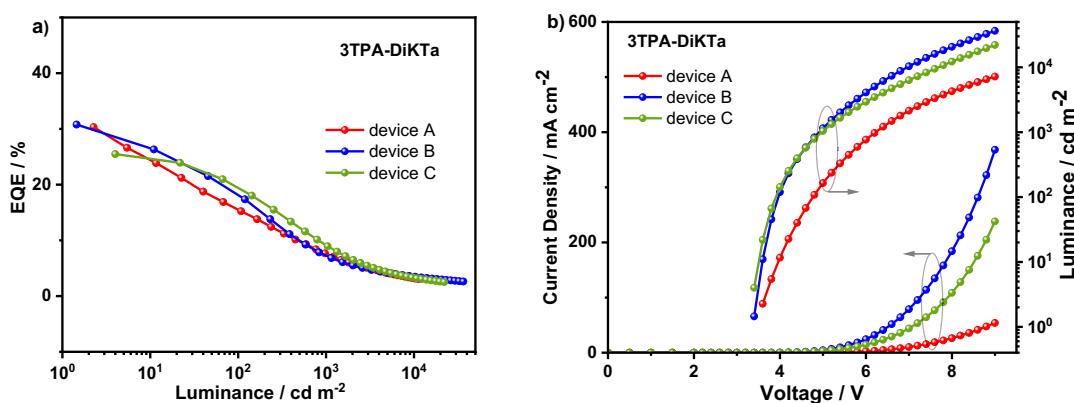

Figure S34. (a) External quantum efficiency versus luminance curves for the **3TPA-DiKTa** devices (A-C); (b) Current density and luminance versus voltage characteristics for the **3TPA-DiKTa** devices (A-C). **Device A**: ITO/HATCN (5 nm)/TAPC (40 nm)/mCP (10 nm)/emissive layer (2 wt% **3TPA-DiKTa** in mCP) (20 nm)/PPT (10 nm)/TmPyPB (50 nm)/LiF (0.6 nm)/Al (100 nm). **Device B**: ITO/HATCN (5 nm)/TAPC (40 nm)/TCTA (10 nm)/mCP (10 nm)/emissive layer (2 wt% **3TPA-DiKTa** in mCP) (20 nm)/TmPyPB (50 nm)/LiF (0.6 nm)/Al (100 nm). **Device C**: ITO/HATCN (5 nm)/TAPC (40 nm)/TCTA (10 nm)/mCP (10 nm)/emissive layer (2 wt% **3TPA-DiKTa** in mCP) (20 nm)/PPT (10 nm)/TmPyPB (50 nm)/LiF (0.6 nm)/Al (100 nm).

We also fabricated devices A and C from **3TPA-DiKTa** by using TCTA (as a HTL)

and 2,8-bis(diphenyl-phosphoryl)-dibenzo[b,d]thiophene (PPT) (as a HBL). The OLEDs performances are shown in Figure S34 and summarized in Table S8. Devices A and C reached lower luminance and low current density with poorer device performance than the optimized device structure (device B) (Figure S34 and Table S8).

Table S8. Electroluminescence data of 3TPA-DiKTa in the various device stacks.

| Devices <sup>a</sup> | V <sub>on</sub> <sup>b</sup> / V | EQE <sup>c</sup> / % | L <sub>max</sub> <sup>d</sup> / cd m <sup>-2</sup> | Current density <sup>d</sup> / mA cm <sup>-2</sup> |
|----------------------|----------------------------------|----------------------|----------------------------------------------------|----------------------------------------------------|
| Device A             | 3.6                              | 30.3/16.0/7.6/3.1    | 11267                                              | 54                                                 |
| Device B             | 3.4                              | 30.8/18.1/7.3/3.5    | 36421                                              | 368                                                |
| Device C             | 3.4                              | 25.5/19.3/9.1/3.3    | 22083                                              | 238                                                |

<sup>a</sup> Device A: ITO/HATCN (5 nm)/TAPC (40 nm)/mCP (10 nm)/emissive layer (2 wt% 3TPA-DiKTa in mCP) (20 nm)/PPT (10 nm)/TmPyPB (50 nm)/LiF (0.6 nm)/Al (100 nm); Device B: ITO/HATCN(5 nm)/TAPC (40 nm)/TCTA (10 nm)/mCP (10 nm)/emissive layer (2 wt% 3TPA-DiKTa in mCP) (20 nm)/TmPyPB (50 nm)/LiF (0.6 nm)/Al (100 nm); Device C: ITO/HATCN (5 nm)/TAPC (40 nm)/TCTA (10 nm)/mCP (10 nm)/emissive layer (2 wt% 3TPA-DiKTa in mCP) (20 nm)/PPT (10 nm)/TmPyPB (50 nm)/LiF (0.6 nm)/Al (100 nm); <sup>b</sup> The turn-on voltage at EQE<sub>max</sub>. <sup>c</sup> The order of measured values: the EQE<sub>max</sub>/EQE<sub>100</sub>/EQE<sub>1000</sub>/EQE<sub>10,000</sub>. <sup>d</sup> Luminance<sub>max</sub> and current density at 9 V.

Table S9. Performance of OLEDs using DiKTa derivatives

| Emitters <sup>a</sup>  | λ <sub>EL</sub> / nm | FWHM / nm | EQE <sub>max</sub> / % | EQE <sub>100</sub> / % | Roll-off / % at EQE <sub>100</sub> | L <sub>max</sub> / cd m <sup>-2</sup> | Reference |
|------------------------|----------------------|-----------|------------------------|------------------------|------------------------------------|---------------------------------------|-----------|
| 3DPA-DiKTa             | 613                  | 60        | 16.7                   | 3.4                    | 79.6                               | 8829                                  | This work |
| 3TPA-DiKTa             | 551                  | 62        | 30.8                   | 18.1                   | 41.2                               | 36 421                                | This work |
| 3DPA-DiKTa (HF)        | 615                  | 61        | 17.9                   | 8.7                    | 51.4                               | 46 003                                | This work |
| 3TPA-DiKTa (HF)        | 556                  | 70        | 30.0                   | 27.4                   | 8.6                                | 112 190                               | This work |
| DiKTa                  | 465                  | 39        | 14.7                   | 8.3                    | 43.5                               | 10 385                                | [27]      |
| Mes <sub>3</sub> DiKTa | 480                  | 36        | 21.1                   | 14.5                   | 31.3                               | 12 949                                |           |
| QAD (akaDiKTa)         | 468                  | 39        | 19.4                   | 9.4                    | 51.5                               | 1100                                  | [28]      |
| 3Ph-QAD                | 480                  | 44        | 19.1                   | 10.4                   | 45.5                               | 4975                                  | [29]      |
| 7Ph-QAD                | 472                  | 34        | 18.7                   | 2.1                    | 88.7                               | 2944                                  |           |
| Cz-DiKTa               | 511                  | 62        | 24.9                   | 20.4                   | 18.1                               | 13 260                                | [8]       |
| Cz-Ph-DiKTa            | 492                  | 61        | 23.0                   | 19.3                   | 16.1                               | 8529                                  |           |
| 3Cz-DiKTa              | 547                  | 54        | 24.4                   | 17.3                   | 29.1                               | 10 796                                |           |
| QAD-Cz                 | 494                  | 57        | 20.3                   | 5.4                    | 73.4                               | -                                     | [30]      |

|                  |     |    |      |      |      |       |      |
|------------------|-----|----|------|------|------|-------|------|
| <b>QAD-2Cz</b>   | 530 | 56 | 27.3 | 23.9 | 12.4 | -     |      |
| <b>QAD-mTDPa</b> | 589 | 67 | 26.3 | 12.9 | 51.0 | -     |      |
| <b>DDiKTa</b>    | 500 | 59 | 19.0 | 7.9  | 58.4 | 501   | [31] |
| <b>QA-PF</b>     | 474 | 27 | 16.8 | 5.6  | 66.6 | 1740  | [32] |
| <b>QA-PCN</b>    | 473 | 30 | 16.9 | 9.4  | 44.4 | 2760  |      |
| <b>QA-PMO</b>    | 484 | 27 | 15.0 | 3.5  | 76.6 | 3040  |      |
| <b>QA-PCZ</b>    | 482 | 29 | 17.5 | 7.6  | 56.5 | 3600  |      |
| <b>QAOCz1</b>    | 516 | 44 | 16.9 | -    | -    | 11320 | [33] |
| <b>QAOCz2</b>    | 504 | 43 | 19.4 | -    | -    | 7679  |      |
| <b>QAOCz3</b>    | 500 | 40 | 21.1 | -    | -    | 6217  |      |
| <b>BOQAO</b>     | 484 | 32 | 21.8 | -    | -    |       | [34] |

<sup>a</sup> Emitter structures are shown in Figure S32.

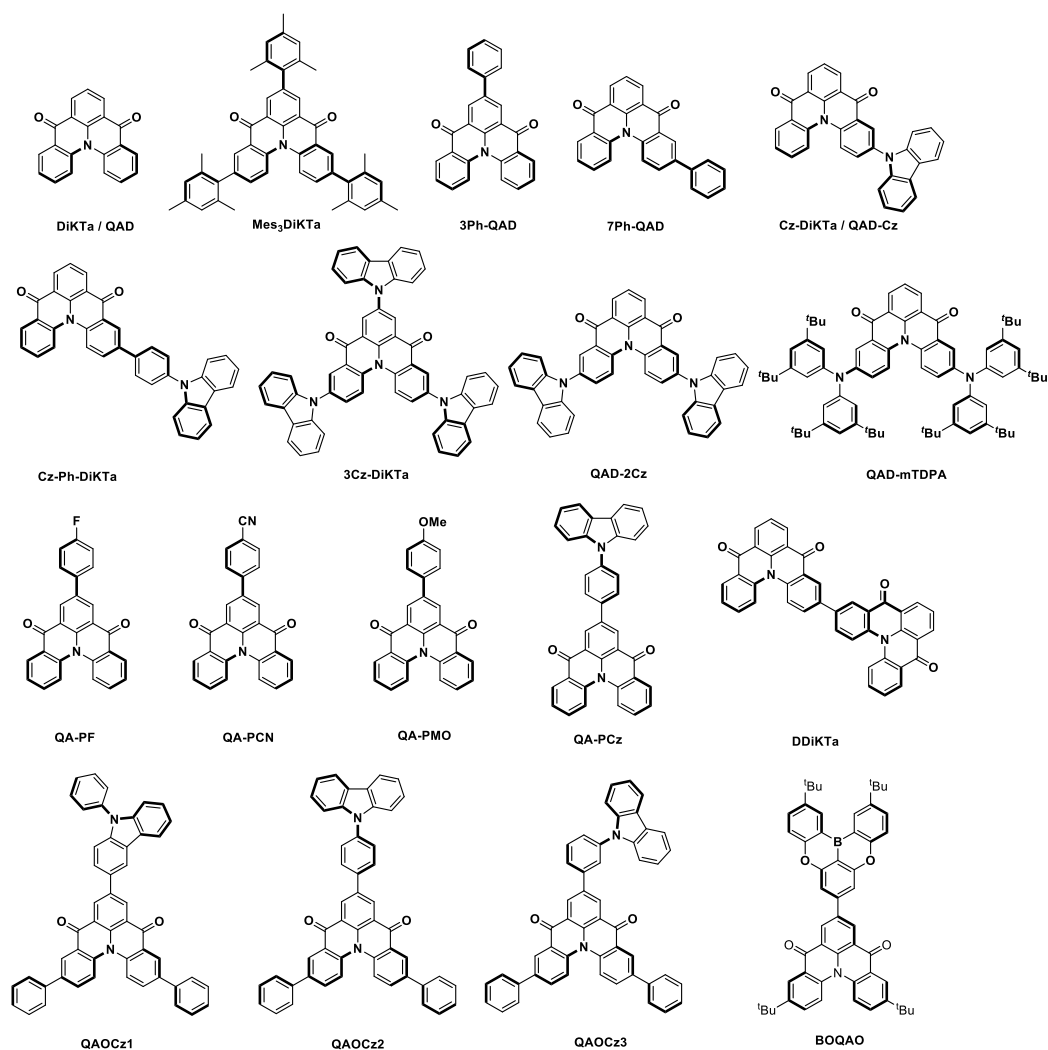

Figure S35. Chemical structures of DiKTa derivatives (the date related to these

structures are summarised in Table S9).

## References:

- [1] N. G. Connelly, W. E. Geiger, *Chem. Rev.* **1996**, *96*, 877-910.
- [2] a) J. Demasa, G. Crosby, *J. Chem. Phys.* **1968**, *48*, 4726; b) G. A. D. Crosby, J.N., *The Journal of Physical Chemistry* **1971**, *75*, 991-1024.
- [3] M. Fischer, J. Georges, *Chem. Phys. Lett.* **1996**, *260*, 115-118.
- [4] N. C. Greenham, I. D. W. Samuel, G. R. Hayes, R. T. Phillips, Y. A. R. R. Kessener, S. C. Moratti, A. B. Holmes, R. H. Friend, *Chem. Phys. Lett.* **1995**, *241*, 89-96.
- [5] F. B. Dias, T. J. Penfold, A. P. Monkman, *Methods Appl. Fluoresc.* **2017**, *5*, 012001.
- [6] a) J. Wasey, A. Safonov, I. Samuel, W. Barnes, *Opt. Commun.* **2000**, *183*, 109-121; b) J. Frischeisen, D. Yokoyama, C. Adachi, W. Brütting, *Appl. Phys. Lett.* **2010**, *96*, 29.
- [7] T. D. Schmidt, T. Lampe, P. I. Djurovich, M. E. Thompson, W. Brütting, *Phys. Rev. Appl.* **2017**, *8*, 037001.
- [8] S. Wu, W. Li, K. Yoshida, D. Hall, S. Madayanad Suresh, T. Sayner, J. Gong, D. Beljonne, Y. Olivier, I. D. W. Samuel, E. Zysman-Colman, *ACS Appl. Mater. Interfaces* **2022**, *14*, 22341-22352.
- [9] a) K. A. Neyts, *J. Opt. Soc. Am. A* **1998**, *15*, 962-971; b) S. Nowy, B. C. Krummacher, J. Frischeisen, N. A. Reinke, W. Brütting, *J. Appl. Phys.* **2008**, *104*, 123109; c) M. Furno, R. Meerheim, S. Hofmann, B. Lüssem, K. Leo, *Phys. Rev. B* **2012**, *85*, 115205.
- [10] G. W. T. M. J. Frisch, H. B. Schlegel, G. E. Scuseria, M. A. Robb, J. R. Cheeseman, G. Scalmani, V. Barone, B. Mennucci, G. A. Petersson, H. Nakatsuji, M. Caricato, X. Li, H. P. Hratchian, A. F. Izmaylov, J. Bloino, G. Zheng, J. L. Sonnenberg, M. Hada, M. Ehara, K. Toyota, R. Fukuda, J. Hasegawa, M. Ishida, T. Nakajima, Y. Honda, O. Kitao, H. Nakai, T. Vreven, J. A. Montgomery Jr., J. E. Peralta, F. Ogliaro, M. Bearpark, J. J. Heyd, E. Brothers, K. N. Kudin, V. N. Staroverov, R. Kobayashi, J. Normand, K. Raghavachari, A. Rendell, J. C. Burant, S. S. Iyengar, J. Tomasi, M. Cossi, N. Rega, J. M. Millam, M. Klene, J. E. Knox, J. B. Cross, V. Bakken, C. Adamo, J. Jaramillo, R. Gomperts, R. E. Stratmann, O. Yazyev, A. J. Austin, R. Cammi, C. Pomelli, J. W. Ochterski, R. L. Martin, K. Morokuma, V. G. Zakrzewski, G. A. Voth, P. Salvador, J. J. Dannenberg, S. Dapprich, A. D. Daniels, Ö. Farkas, J. B. Foresman, J. V. Ortiz, J. Cioslowski, D. J. Fox, , *Gaussian Inc., Wallingford, CT*, **2009**.
- [11] C. Adamo, V. Barone, *J. Chem. Phys.* **1999**, *110*, 6158-6170.
- [12] T. H. Dunning Jr, *J. Chem. Phys.* **1989**, *90*, 1007-1023.
- [13] a) S. Grimme, *Chem. Phys. Lett.* **1996**, *259*, 128-137; b) S. Hirata, M. Head-Gordon, *Chem. Phys. Lett.* **1999**, *314*, 291-299.
- [14] G. A. Petersson, M. A. Al - Laham, *J. Chem. Phys.* **1991**, *94*, 6081-6090.
- [15] K. Momma, F. Izumi, *J. Appl. Crystallogr.* **2011**, *44*, 1272-1276.
- [16] in *CrystalClear-SM Expert v2.1. Rigaku Americas, The Woodlands, Texas, USA, and Rigaku Corporation, Tokyo, Japan, 2015*.
- [17] a) *CrysAlisPro v1.171.40.14a and 1.171.41.93a*. ; b) *Rigaku Oxford Diffraction, Rigaku Corporation, Oxford, U.K., 2018-2020*.
- [18] G. M. Sheldrick, *Acta Crystallogr. A* **2015**, *71*, 3-8.
- [19] G. M. Sheldrick, *Acta Crystallogr. C* **2015**, *71*, 3-8.
- [20] A. L. Spek, *Acta Crystallogr. C* **2015**, *71*, 9-18.
- [21] A. L. Spek, *Acta Crystallogr. D* **2009**, *65*, 148-155.
- [22] O. V. Dolomanov, L. J. Bourhis, R. J. Gildea, J. A. Howard, H. Puschmann, *J. Appl. Crystallogr.* **2009**, *42*, 339-341.
- [23] S. Madayanad Suresh, D. Hall, D. Beljonne, Y. Olivier, E. Zysman - Colman, *Adv. Funct. Mater.* **2020**, *30*, 1908677.
- [24] N. G. Connelly, W. E. Geiger, *Chemical Reviews* **1996**, *96*, 877-910.
- [25] J. Mooney, P. Kambhampati, *J. Phys. Chem. Lett.* **2013**, *4*, 3316-3318.
- [26] a) K. Masui, H. Nakanotani, C. Adachi, *Org. Electron.* **2013**, *14*, 2721-2726; b) Y. Tsuchiya, S. Diesing, F. Bencheikh, Y. Wada, P. L. Dos Santos, H. Kaji, E. Zysman-



- Colman, I. D. Samuel, C. Adachi, *J. Phys. Chem. A* **2021**, *125*, 8074-8089.
- [27] D. Hall, S. M. Suresh, P. L. dos Santos, E. Duda, S. Bagnich, A. Pershin, P. Rajamalli, D. B. Cordes, A. M. Z. Slawin, D. Beljonne, A. Köhler, I. D. W. Samuel, Y. Olivier, E. Zysman-Colman, *Adv. Opt. Mater.* **2020**, *8*, 1901627.
- [28] Y. Yuan, X. Tang, X.-Y. Du, Y. Hu, Y.-J. Yu, Z.-Q. Jiang, L.-S. Liao, S.-T. Lee, *Adv. Opt. Mater.* **2019**, *7*, 1801536.
- [29] X. Li, Y.-Z. Shi, K. Wang, M. Zhang, C.-J. Zheng, D.-M. Sun, G.-L. Dai, X.-C. Fan, D.-Q. Wang, W. Liu, *ACS Appl. Mater. Interfaces* **2019**, *11*, 13472-13480.
- [30] F. Huang, K. Wang, Y.-Z. Shi, X.-C. Fan, X. Zhang, J. Yu, C.-S. Lee, X.-H. Zhang, *ACS Appl. Mater. Interfaces* **2021**, *13*, 36089-36097.
- [31] D. Sun, S. M. Suresh, D. Hall, M. Zhang, C. Si, D. B. Cordes, A. M. Z. Slawin, Y. Olivier, X. Zhang, E. Zysman-Colman, *Mater. Chem. Front.* **2020**, *4*, 2018-2022.
- [32] X. Qiu, G. Tian, C. Lin, Y. Pan, X. Ye, B. Wang, D. Ma, D. Hu, Y. Luo, Y. Ma, *Adv. Opt. Mater.* **2021**, *9*, 2001845.
- [33] J.-F. Liu, S.-N. Zou, X. Chen, S.-Y. Yang, Y.-J. Yu, M.-K. Fung, Z.-Q. Jiang, L.-S. Liao, *Mater. Chem. Front.* **2022**, *6*, 966-972.
- [34] Y.-J. Yu, S.-N. Zou, C.-C. Peng, Z.-Q. Feng, Y.-K. Qu, S.-Y. Yang, Z.-Q. Jiang, L.-S. Liao, *J. Mater. Chem. C* **2022**, *10*, 4941-4946.
